# Supplementary material for: Stable isotope and dental caries data reveal abrupt changes in subsistence economy in ancient China in response to global climate change
Source: PLoS One. 2019 Jul 22;14(7):e0218943. doi: 10.1371/journal.pone.0218943 (PMC6645670; doi:10.1371/journal.pone.0218943)
Supplement: S3 File — Detailed sample information, and the bone collagen δ13C and δ15N values of all samples analyzed in this study. The column “Radiocarbon date” refers to whether the site has been radiocarbon dated: Y indicates that radiocarbon dates are provided in the cited studies/study; N indicates that no radiocarbon date is provided in the cited studies/study. (XLSX) [file pone.0218943.s003.xlsx]

## Sheet: By site
Province_group	Site	Phase	Culture	Period	Radiocarbon date	Sample No.	d13C	d15N
NCP	Jiahu	1	Jiahu I-1	7000-6600 BC	N	M341	-18.77	8.69
NCP	Jiahu	1	Jiahu I-2	7000-6600 BC	N	M109	-20.02	9.69
NCP	Jiahu	1	Jiahu I-2	7000-6600 BC	N	M126	-20.1	9.23
NCP	Jiahu	1	Jiahu I-2	7000-6600 BC	N	M318	-20.24	7.58
NCP	Jiahu	1	Jiahu I-3	7000-6600 BC	N	M243	-20.55	8.68
NCP	Jiahu	2	Jiahu II-4	6600-6200 BC	N	M380	-20.45	8.28
NCP	Jiahu	2	Jiahu II-5	6600-6200 BC	N	M282	-20.33	9.96
NCP	Jiahu	2	Jiahu II-5	6600-6200 BC	N	M344	-20.34	9.47
NCP	Jiahu	2	Jiahu II-5	6600-6200 BC	N	M394	-20.83	10.46
NCP	Xiaojingshan	3	Houli Culture	6060-5750 BC	N	M4	-18.2	9
NCP	Xiaojingshan	3	Houli Culture	6060-5750 BC	N	M14	-17.4	8.1
NCP	Xiaojingshan	3	Houli Culture	6060-5750 BC	N	M2	-17.9	9.2
NCP	Xiaojingshan	3	Houli Culture	6060-5750 BC	N	M16	-17.5	8.6
NCP	Xiaojingshan	3	Houli Culture	6060-5750 BC	N	M20	-18	9.4
NCP	Xiaojingshan	3	Houli Culture	6060-5750 BC	N	M19	-18.2	9.8
NCP	Xiaojingshan	3	Houli Culture	6060-5750 BC	N	M1	-17.4	8.1
NCP	Xiaojingshan	3	Houli Culture	6060-5750 BC	N	M21	-17.9	9.2
NCP	Xiaojingshan	3	Houli Culture	6060-5750 BC	N	M17	-17.4	9.1
NCP	Xiaojingshan	3	Houli Culture	6060-5750 BC	N	M15	-17.8	9.4
NCP	Gouwan	5	Yangshao I	7000-6600 BP	N	M83	-15.3	7.2
NCP	Gouwan	5	Yangshao I	7000-6600 BP	N	M74	-14.8	7.1
NCP	Gouwan	5	Yangshao I	7000-6600 BP	N	M65	-14.3	6.9
NCP	Gouwan	5	Yangshao I	7000-6600 BP	N	M81	-13.6	7.1
NCP	Gouwan	5	Yangshao I	7000-6600 BP	N	M75	-14	7.1
NCP	Gouwan	5	Yangshao I	7000-6600 BP	N	M76	-14.6	7.3
NCP	Gouwan	5	Yangshao I	7000-6600 BP	N	M73	-12.7	7.3
NCP	Gouwan	5	Yangshao I	7000-6600 BP	N	M103	-15.5	7.8
NCP	Gouwan	5	Yangshao I	7000-6600 BP	N	M106	-15.6	6.9
NCP	Gouwan	5	Yangshao I	7000-6600 BP	N	M101	-14.2	7
NCP	Gouwan	6	Yangshao IIA	6600-6000 BP	N	M53	-13.8	8.3
NCP	Gouwan	6	Yangshao IIA	6600-6000 BP	N	M86	-14.3	9.7
NCP	Gouwan	6	Yangshao IIA	6600-6000 BP	N	M39	-13.1	8.7
NCP	Gouwan	6	Yangshao IIA	6600-6000 BP	N	M41	-15.7	10.1
NCP	Gouwan	6	Yangshao IIA	6600-6000 BP	N	M52	-20	10
NCP	Gouwan	6	Yangshao IIA	6600-6000 BP	N	M48	-13.6	8.4
NCP	Gouwan	6	Yangshao IIA	6600-6000 BP	N	M59	-12.7	8.6
NCP	Gouwan	6	Yangshao IIA	6600-6000 BP	N	M34	-13.3	9.1
NCP	Gouwan	6	Yangshao IIA	6600-6000 BP	N	M88	-12.7	10
NCP	Gouwan	6	Yangshao IIA	6600-6000 BP	N	M89	-18.4	10.6
NCP	Gouwan	6	Yangshao IIA	6600-6000 BP	N	M92	-11.8	8.9
NCP	Gouwan	6	Yangshao IIB	6600-6000 BP	N	M22	-19.5	10.6
NCP	Gouwan	6	Yangshao IIB	6600-6000 BP	N	M21	-12.2	8.4
NCP	Gouwan	6	Yangshao IIB	6600-6000 BP	N	M20	-11.1	7.6
NCP	Gouwan	6	Yangshao IIB	6600-6000 BP	N	M31	-13.5	8
NCP	Gouwan	6	Yangshao IIB	6600-6000 BP	N	M16	-14.4	7.9
NCP	Gouwan	6	Yangshao IIB	6600-6000 BP	N	M24	-12.1	7.6
NCP	Gouwan	6	Yangshao IIB	6600-6000 BP	N	M70	-12.8	8.8
NCP	Gouwan	6	Yangshao IIB	6600-6000 BP	N	M104	-14.4	8.9
NCP	Gouwan	6	Yangshao IIB	6600-6000 BP	N	M98	-13.7	8.5
NCP	Gouwan	7	Yangshao III	6000-5500 BP	N	M80	-15.7	8.8
NCP	Gouwan	7	Yangshao III	6000-5500 BP	N	M79	-14.3	8.2
NCP	Gouwan	7	Yangshao III	6000-5500 BP	N	M42	-12.2	8.2
NCP	Gouwan	7	Yangshao III	6000-5500 BP	N	M105	-16.8	9.5
NCP	Gouwan	7	Yangshao III	6000-5500 BP	N	M95	-16.3	9.2
NCP	Gouwan	7	Yangshao III	6000-5500 BP	N	M102	-14.4	9.1
NCP	Gouwan	9	Qujialing Culture	5000-4600 BP	N	M61	-14.4	7.6
NCP	Qinglongquan	9	Qujialing Culture	3000-2600 BC	N	M155*	-15.3	9.9
NCP	Qinglongquan	9	Qujialing Culture	3000-2600 BC	N	M190*	-15.9	9.2
NCP	Qinglongquan	9	Qujialing Culture	3000-2600 BC	N	M157E*	-16.5	10.1
NCP	Qinglongquan	9	Qujialing Culture	3000-2600 BC	N	M79*	-14.1	6.8
NCP	Qinglongquan	9	Qujialing Culture	3000-2600 BC	N	M184*	-16.1	9.2
NCP	Qinglongquan	9	Qujialing Culture	3000-2600 BC	N	M157W*	-15.5	9.8
NCP	Qinglongquan	9	Qujialing Culture	3000-2600 BC	N	M162*	-16.7	9.9
NCP	Xigongqiao	9	Dawenkou Culture	5000-4500 BP	N	XM36	-12.08	8.14
NCP	Xigongqiao	9	Dawenkou Culture	5000-4500 BP	N	XM41	-16.46	6.03
NCP	Xigongqiao	9	Dawenkou Culture	5000-4500 BP	N	XM29	-10.16	10.44
NCP	Qinglongquan	10	Shijiahe Culture	2600-2200 BC	N	M132*	-12.9	8.5
NCP	Qinglongquan	10	Shijiahe Culture	2600-2200 BC	N	M69*	-12.4	9.9
NCP	Qinglongquan	10	Shijiahe Culture	2600-2200 BC	N	M110A*	-13.1	9.2
NCP	Qinglongquan	10	Shijiahe Culture	2600-2200 BC	N	M78*	-14.7	8.2
NCP	Qinglongquan	10	Shijiahe Culture	2600-2200 BC	N	M67*	-12.9	9.4
NCP	Qinglongquan	10	Shijiahe Culture	2600-2200 BC	N	M127*	-13.7	8.2
NCP	Qinglongquan	10	Shijiahe Culture	2600-2200 BC	N	M187*	-15.3	9.2
NCP	Qinglongquan	10	Shijiahe Culture	2600-2200 BC	N	M110B*	-14.2	9.6
NCP	Qinglongquan	10	Shijiahe Culture	2600-2200 BC	N	M133*	-14.6	6.6
NCP	Qinglongquan	10	Shijiahe Culture	2600-2200 BC	N	M139*	-15.4	9.7
NCP	Qinglongquan	10	Shijiahe Culture	2600-2200 BC	N	M128*	-13.6	8.9
NCP	Qinglongquan	10	Shijiahe Culture	2600-2200 BC	N	M145*	-15.9	10.8
NCP	Qinglongquan	10	Shijiahe Culture	2600-2200 BC	N	M158*	-14	9.5
NCP	Qinglongquan	10	Shijiahe Culture	2600-2200 BC	N	M124*	-14.3	6.7
NCP	Qinglongquan	10	Shijiahe Culture	2600-2200 BC	N	M118*	-15.7	9.2
NCP	Qinglongquan	10	Shijiahe Culture	2600-2200 BC	N	M98*	-15.4	7.1
NCP	Qinglongquan	10	Shijiahe Culture	2600-2200 BC	N	M148*	-13	10.4
NCP	Wadian	10	Longshan Culture	4200-3900 BP	N	WD2T4043H2	-10.1	8.4
NCP	Wadian	10	Longshan Culture	4200-3900 BP	N	WD2T4043H24	-15	10.4
NCP	Wadian	10	Longshan Culture	4200-3900 BP	N	WD2T4043H43	-13.4	10.3
NCP	Wadian	10	Longshan Culture	4200-3900 BP	N	WD2T4143_	-9.6	7.3
NCP	Wadian	10	Longshan Culture	4200-3900 BP	N	WD2T4143_	-10.1	7.3
NCP	Wadian	10	Longshan Culture	4200-3900 BP	N	WD2T4143_	-9.6	6.8
NCP	Wadian	10	Longshan Culture	4200-3900 BP	N	WD2T4143H27	-9.6	7.3
NCP	Wadian	10	Longshan Culture	4200-3900 BP	N	WD2T4143H27	-9.9	7.7
NCP	Wadian	10	Longshan Culture	4200-3900 BP	N	WD2T4143H27	-14.5	9.9
NCP	Wadian	10	Longshan Culture	4200-3900 BP	N	WD2T4144H46	-10.8	7.3
NCP	Wadian	10	Longshan Culture	4200-3900 BP	N	WD2T4144H46	-10.8	7.4
NCP	Wadian	10	Longshan Culture	4200-3900 BP	N	WD2T4144_	-8.7	8.4
NCP	Liuzhuang	11	Proto-Shang	1750-1600 BC	N	M5	-7	9.8
NCP	Liuzhuang	11	Proto-Shang	1750-1600 BC	N	M13	-8	10
NCP	Liuzhuang	11	Proto-Shang	1750-1600 BC	N	M14	-7.7	10.3
NCP	Liuzhuang	11	Proto-Shang	1750-1600 BC	N	M15	-7.6	8.9
NCP	Liuzhuang	11	Proto-Shang	1750-1600 BC	N	M34	-8.3	10.1
NCP	Liuzhuang	11	Proto-Shang	1750-1600 BC	N	M58	-7.7	12
NCP	Liuzhuang	11	Proto-Shang	1750-1600 BC	N	M85	-7.9	9.6
NCP	Liuzhuang	11	Proto-Shang	1750-1600 BC	N	M136	-8.2	9.8
NCP	Liuzhuang	11	Proto-Shang	1750-1600 BC	N	M152	-12.2	14.3
NCP	Liuzhuang	11	Proto-Shang	1750-1600 BC	N	M153	-7.4	10.4
NCP	Liuzhuang	11	Proto-Shang	1750-1600 BC	N	M172	-7.4	9.8
NCP	Liuzhuang	11	Proto-Shang	1750-1600 BC	N	M195	-7.1	10.3
NCP	Liuzhuang	11	Proto-Shang	1750-1600 BC	N	M217	-6.9	9
NCP	Liuzhuang	11	Proto-Shang	1750-1600 BC	N	M227	-6.9	8.5
NCP	Liuzhuang	11	Proto-Shang	1750-1600 BC	N	M231	-6.8	8.9
NCP	Liuzhuang	11	Proto-Shang	1750-1600 BC	N	M233	-8.5	9.5
NCP	Liuzhuang	11	Proto-Shang	1750-1600 BC	N	M234	-7.6	9.9
NCP	Liuzhuang	11	Proto-Shang	1750-1600 BC	N	M236	-9	7.2
NCP	Liuzhuang	11	Proto-Shang	1750-1600 BC	N	M274	-7.8	8.4
NCP	Liuzhuang	11	Proto-Shang	1750-1600 BC	N	M302	-15.1	6.8
NCP	Liuzhuang	11	Proto-Shang	1750-1600 BC	N	M330	-7.5	10
NCP	Nancheng	11	Proto-Shang	2000-1600 BC	N	M80	-6.1	10
NCP	Nancheng	11	Proto-Shang	2000-1600 BC	N	M40	-6.5	9.4
NCP	Nancheng	11	Proto-Shang	2000-1600 BC	N	M89	-7	8.9
NCP	Nancheng	11	Proto-Shang	2000-1600 BC	N	M66	-6.7	9.3
NCP	Nancheng	11	Proto-Shang	2000-1600 BC	N	M15	-7.2	9.4
NCP	Nancheng	11	Proto-Shang	2000-1600 BC	N	M87	-6.5	9.8
NCP	Nancheng	11	Proto-Shang	2000-1600 BC	N	M3	-6.5	9.7
NCP	Nancheng	11	Proto-Shang	2000-1600 BC	N	M12	-6.7	9.3
NCP	Nancheng	11	Proto-Shang	2000-1600 BC	N	M29	-7	9.7
NCP	Nancheng	11	Proto-Shang	2000-1600 BC	N	M32	-6.2	9.5
NCP	Nancheng	11	Proto-Shang	2000-1600 BC	N	M19	-7.7	9.4
NCP	Nancheng	11	Proto-Shang	2000-1600 BC	N	M23	-6.5	9.2
NCP	Nancheng	11	Proto-Shang	2000-1600 BC	N	M45	-7.6	9.3
NCP	Nancheng	11	Proto-Shang	2000-1600 BC	N	M78	-7	9.6
NCP	Nancheng	11	Proto-Shang	2000-1600 BC	N	M7	-6.9	9.1
NCP	Nancheng	11	Proto-Shang	2000-1600 BC	N	M72	-6.6	9.6
NCP	Nancheng	11	Proto-Shang	2000-1600 BC	N	M33	-6.8	8.5
NCP	Nancheng	11	Proto-Shang	2000-1600 BC	N	M34	-7.4	9.3
NCP	Nancheng	11	Proto-Shang	2000-1600 BC	N	M76	-6.6	9.9
NCP	Nancheng	11	Proto-Shang	2000-1600 BC	N	M21	-6.2	9.2
NCP	Nancheng	11	Proto-Shang	2000-1600 BC	N	M54	-6.7	9.4
NCP	Nancheng	11	Proto-Shang	2000-1600 BC	N	M36	-7.3	9.5
NCP	Nancheng	11	Proto-Shang	2000-1600 BC	N	M47	-6.6	9.5
NCP	Nancheng	11	Proto-Shang	2000-1600 BC	N	M10	-6.7	9.9
NCP	Nancheng	11	Proto-Shang	2000-1600 BC	N	M69	-7	9.5
NCP	Nancheng	11	Proto-Shang	2000-1600 BC	N	M5	-6.7	9.1
NCP	Nancheng	11	Proto-Shang	2000-1600 BC	N	M73	-6.4	9.7
NCP	Nancheng	11	Proto-Shang	2000-1600 BC	N	M38	-7.8	9.4
NCP	Nancheng	11	Proto-Shang	2000-1600 BC	N	M30	-6.9	9.8
NCP	Nancheng	11	Proto-Shang	2000-1600 BC	N	M39	-6.5	9
NCP	Nancheng	11	Proto-Shang	2000-1600 BC	N	M62	-7.4	9.4
NCP	Nancheng	11	Proto-Shang	2000-1600 BC	N	M64	-6.8	9.5
NCP	Nancheng	11	Proto-Shang	2000-1600 BC	N	M86	-7.1	8.9
NCP	Nancheng	11	Proto-Shang	2000-1600 BC	N	M91	-7.5	10.8
NCP	Nancheng	11	Proto-Shang	2000-1600 BC	N	M42	-7	8.8
NCP	Nancheng	11	Proto-Shang	2000-1600 BC	N	M88	-6.7	8.6
NCP	Nancheng	11	Proto-Shang	2000-1600 BC	N	M61	-7.8	9.3
NCP	Nancheng	11	Proto-Shang	2000-1600 BC	N	M74	-7.3	9
NCP	Nancheng	11	Proto-Shang	2000-1600 BC	N	M2	-6.7	9.8
NCP	Nancheng	11	Proto-Shang	2000-1600 BC	N	M14	-6.3	8.6
NCP	Nancheng	11	Proto-Shang	2000-1600 BC	N	M17	-6.4	8.9
NCP	Nancheng	11	Proto-Shang	2000-1600 BC	N	M27	-7.1	8.9
NCP	Nancheng	11	Proto-Shang	2000-1600 BC	N	M28	-6.8	11.1
NCP	Nancheng	11	Proto-Shang	2000-1600 BC	N	M44	-6.9	7.9
NCP	Nancheng	11	Proto-Shang	2000-1600 BC	N	M49	-6.7	9.3
NCP	Nancheng	11	Proto-Shang	2000-1600 BC	N	M51	-8.3	9.8
NCP	Nancheng	11	Proto-Shang	2000-1600 BC	N	M52	-6.3	9.9
NCP	Nancheng	11	Proto-Shang	2000-1600 BC	N	M53	-6.5	9.8
NCP	Nancheng	11	Proto-Shang	2000-1600 BC	N	M57	-6.7	9.4
NCP	Nancheng	11	Proto-Shang	2000-1600 BC	N	M58	-7.4	8.8
NCP	Nancheng	11	Proto-Shang	2000-1600 BC	N	M75	-5.8	10.4
NCP	Nancheng	11	Proto-Shang	2000-1600 BC	N	M18	-6.6	9.7
NCP	Nancheng	11	Proto-Shang	2000-1600 BC	N	M50	-6.7	9.4
NCP	Nancheng	11	Proto-Shang	2000-1600 BC	N	M13	-6.9	8.3
NCP	Nancheng	11	Proto-Shang	2000-1600 BC	N	M43	-7.1	9.9
NCP	Nancheng	11	Proto-Shang	2000-1600 BC	N	M55	-6.9	9.9
NCP	Nancheng	11	Proto-Shang	2000-1600 BC	N	M56	-6.6	10.5
NCP	Nancheng	11	Proto-Shang	2000-1600 BC	N	M59	-7.1	8.8
NCP	Nancheng	11	Proto-Shang	2000-1600 BC	N	M68	-7.4	8.5
NCP	Nancheng	11	Proto-Shang	2000-1600 BC	N	M71	-6.7	9.7
NCP	Nancheng	11	Proto-Shang	2000-1600 BC	N	M77	-7.1	9.7
NCP	Nancheng	11	Proto-Shang	2000-1600 BC	N	M82	-7.2	9
NCP	Nancheng	11	Proto-Shang	2000-1600 BC	N	M83	-6.8	8.6
NCP	Nancheng	11	Proto-Shang	2000-1600 BC	N	M9	-7.5	8.4
NCP	Nancheng	11	Proto-Shang	2000-1600 BC	N	M26	-6.9	9.8
NCP	Nancheng	11	Proto-Shang	2000-1600 BC	N	M37	-6.4	9.7
NCP	Nancheng	11	Proto-Shang	2000-1600 BC	N	M46	-7.2	9.6
NCP	Nancheng	11	Proto-Shang	2000-1600 BC	N	M48	-6.3	9.7
NCP	Nancheng	11	Proto-Shang	2000-1600 BC	N	M65	-6.6	9.3
NCP	Nancheng	11	Proto-Shang	2000-1600 BC	N	M70	-14.9	10.1
NCP	Nancheng	11	Proto-Shang	2000-1600 BC	N	M81	-7.4	10.1
NCP	Nancheng	11	Proto-Shang	2000-1600 BC	N	M84	-7.1	8.8
NCP	Nancheng	11	Proto-Shang	2000-1600 BC	N	M85	-6.9	8.4
NCP	Nancheng	11	Proto-Shang	2000-1600 BC	N	M90	-6.6	9.7
NCP	Nancheng	11	Proto-Shang	2000-1600 BC	N	M92	-7.4	9.3
NCP	Liujiazhuang	12	Shang	1086-919 BC	N	M109	-9.2	10.95
NCP	Liujiazhuang	12	Shang	1086-919 BC	N	M111	-8.52	11.5
NCP	Liujiazhuang	12	Shang	1086-919 BC	N	M90-1	-7.15	10.09
NCP	Liujiazhuang	12	Shang	1086-919 BC	N	M50	-8.35	9.02
NCP	Liujiazhuang	12	Shang	1086-919 BC	N	M67-1	-8.4	9.22
NCP	Liujiazhuang	12	Shang	1086-919 BC	N	M107	-8.54	9.87
NCP	Liujiazhuang	12	Shang	1086-919 BC	N	M42	-8.84	11.17
NCP	Liujiazhuang	12	Shang	1086-919 BC	N	M7	-7.85	10.96
NCP	Liujiazhuang	12	Shang	1086-919 BC	N	M17	-8.17	9.35
NCP	Liujiazhuang	12	Shang	1086-919 BC	N	M106	-7.73	10.55
NCP	Liujiazhuang	12	Shang	1086-919 BC	N	M32	-8.33	10.01
NCP	Liujiazhuang	12	Shang	1086-919 BC	N	M96	-9.1	9.75
NCP	Liujiazhuang	12	Shang	1086-919 BC	N	M40	-8.01	10.09
NCP	Liujiazhuang	12	Shang	1086-919 BC	N	M18	-8.6	8.77
NCP	Liujiazhuang	12	Shang	1086-919 BC	N	M41	-8.75	9.45
NCP	Liujiazhuang	12	Shang	1086-919 BC	N	M68	-9.23	9.56
NCP	Liujiazhuang	12	Shang	1086-919 BC	N	M79	-9.15	10.07
NCP	Liujiazhuang	12	Shang	1086-919 BC	N	M8	-7.51	9.75
NCP	Liujiazhuang	12	Shang	1086-919 BC	N	M11	-8.32	9.3
NCP	Liujiazhuang	12	Shang	1086-919 BC	N	M108	-8.34	9.86
NCP	Yinxu	12	Late Shang	1250-1046 BC	N	03AXNT1879T1880M115	-10.6	9.7
NCP	Yinxu	12	Late Shang	1250-1046 BC	N	03AXST2705M628	-15.5	10.3
NCP	Yinxu	12	Late Shang	1250-1046 BC	N	03AXST3007H493(3)	-10.1	9
NCP	Yinxu	12	Late Shang	1250-1046 BC	N	03AXST2711M662	-9.6	9
NCP	Yinxu	12	Late Shang	1250-1046 BC	N	03AXN_M140	-8.05	10.13
NCP	Yinxu	12	Late Shang	1250-1046 BC	N	03AXN_M186	-8.76	9.31
NCP	Yinxu	12	Late Shang	1250-1046 BC	N	03AXS_M360	-9.1	10.54
NCP	Yinxu	12	Late Shang	1250-1046 BC	N	03AXS_M385	-7.97	7.71
NCP	Yinxu	12	Late Shang	1250-1046 BC	N	03AXS_M386	-8.14	10.09
NCP	Yinxu	12	Late Shang	1250-1046 BC	N	03AXS_M556	-7.84	10.85
NCP	Yinxu	12	Late Shang	1250-1046 BC	N	03AXS_M662	-10.53	9.185
NCP	Yinxu	12	Late Shang	1250-1046 BC	N	03AXS_M667	-14.56	10.45
NCP	Yinxu	12	Late Shang	1250-1046 BC	N	03AXS_M761	-8.22	9.89
NCP	Yinxu	12	Late Shang	1250-1046 BC	N	03AXS_M769	-9.25	10.14
NCP	Yinxu	12	Late Shang	1250-1046 BC	N	03AXS_M877	-8.85	9.81
NCP	Yinxu	12	Late Shang	1250-1046 BC	N	03AXS_M922	-8.42	10.38
NCP	Yinxu	12	Late Shang	1250-1046 BC	N	03AXS_M976	-9.01	7.69
NCP	Yinxu	12	Late Shang	1250-1046 BC	N	11ALN_M381	-9.02	11.36
NCP	Yinxu	12	Late Shang	1250-1046 BC	N	01HD_M260 (south)	-8.82	9.1
NCP	Yinxu	12	Late Shang	1250-1046 BC	N	01HD_M260 (north)	-7.78	9.42
NCP	Yinxu	12	Late Shang	1250-1046 BC	N	07AXA_M10	-8.5	9.6
NCP	Yinxu	12	Late Shang	1250-1046 BC	N	07AXA_M30	-8.3	10.2
NCP	Yinxu	12	Late Shang	1250-1046 BC	N	07AXA_M35	-9.3	9.8
NCP	Yinxu	12	Late Shang	1250-1046 BC	N	07AXA_M46	-10.7	10.8
NCP	Yinxu	12	Late Shang	1250-1046 BC	N	07AXA_M48	-9.7	10.5
NCP	Yinxu	12	Late Shang	1250-1046 BC	N	07AXA_M49	-9.7	9.5
NCP	Yinxu	12	Late Shang	1250-1046 BC	N	07AXA_M54	-9.1	10.5
NCP	Yinxu	12	Late Shang	1250-1046 BC	N	07AXA_M100	-9.8	9
NCP	Yinxu	12	Late Shang	1250-1046 BC	N	07AXA_M108	-9.8	11.4
NCP	Yinxu	12	Late Shang	1250-1046 BC	N	07AXA_M168	-9.8	10.1
NCP	Yinxu	12	Late Shang	1250-1046 BC	N	07AXA_M170	-10.3	9.4
NCP	Yinxu	12	Late Shang	1250-1046 BC	N	07AXA_M198	-9.8	10.6
NCP	Yinxu	12	Late Shang	1250-1046 BC	N	07AXA_M233	-8.4	10.2
NCP	Yinxu	12	Late Shang	1250-1046 BC	N	07AXA_H102	-9	8.4
NCP	Yinxu	12	Late Shang	1250-1046 BC	N	07AXA_H201	-8.7	9.1
NCP	Yinxu	12	Late Shang	1250-1046 BC	N	07AXA_M9	-9.2	9.5
NCP	Yinxu	12	Late Shang	1250-1046 BC	N	07AXA_M55	-9.1	10.7
NCP	Yinxu	12	Late Shang	1250-1046 BC	N	07AXA_M81	-7.4	10.3
NCP	Yinxu	12	Late Shang	1250-1046 BC	N	07AXA_M91	-9.4	10.9
NCP	Yinxu	12	Late Shang	1250-1046 BC	N	07AXA_M107	-8.8	9.6
NCP	Yinxu	12	Late Shang	1250-1046 BC	N	07AXA_M120	-9.3	9.4
NCP	Yinxu	12	Late Shang	1250-1046 BC	N	07AXA_M125	-8.7	9.8
NCP	Yinxu	12	Late Shang	1250-1046 BC	N	07AXA_M131	-8.9	10
NCP	Yinxu	12	Late Shang	1250-1046 BC	N	07AXA_M137	-8.3	9.8
NCP	Yinxu	12	Late Shang	1250-1046 BC	N	07AXA_M139	-7.8	10.8
NCP	Yinxu	12	Late Shang	1250-1046 BC	N	07AXA_M156	-8.8	8.6
NCP	Yinxu	12	Late Shang	1250-1046 BC	N	07AXA_M181	-8.3	11.1
NCP	Yinxu	12	Late Shang	1250-1046 BC	N	07AXA_M184	-8.7	9.9
NCP	Yinxu	12	Late Shang	1250-1046 BC	N	07AXA_M188	-9.3	9.8
NCP	Yinxu	12	Late Shang	1250-1046 BC	N	07AXA_M193	-8.6	10.3
NCP	Yinxu	12	Late Shang	1250-1046 BC	N	07AXA_M210	-8.5	9.7
NCP	Yinxu	12	Late Shang	1250-1046 BC	N	07AXA_M216	-9	9.7
NCP	Yinxu	12	Late Shang	1250-1046 BC	N	07AXA_M228	-7.5	11.3
NCP	Yinxu	12	Late Shang	1250-1046 BC	N	07AXA_M237	-8.6	10.3
NCP	Yinxu	12	Late Shang	1250-1046 BC	N	07AXA_M238	-8	10.4
NCP	Yinxu	12	Late Shang	1250-1046 BC	N	07AXA_M239	-8.4	9.9
NCP	Yinxu	12	Late Shang	1250-1046 BC	N	93AXA_M165	-9.3	8.9
NCP	Yinxu	12	Late Shang	1250-1046 BC	N	93AXA_M241	-8.6	9.3
NCP	Yinxu	12	Late Shang	1250-1046 BC	N	93AXA_M352	-10.1	9.7
NCP	Xinzheng City	13	Late Western Zhou	1046-771 BC	N	TP-M23	-10.3	8.8
NCP	Xinzheng City	13	Late Western Zhou	1046-771 BC	N	TP-M35	-10	7.5
NCP	Xinzheng City	13	Late Western Zhou	1046-771 BC	N	XH-M4	-10.5	9.5
NCP	Xinzheng City	13	Late Western Zhou	1046-771 BC	N	XH-M6	-11	7.6
NCP	Xinzheng City	13	Late Western Zhou	1046-771 BC	N	XH-M18	-11.1	8
NCP	Xinzheng City	13	Late Western Zhou	1046-771 BC	N	XH-M25	-8.9	8.3
NCP	Xinzheng City	13	Late Western Zhou	1046-771 BC	N	XH-M55	-8.9	9.1
NCP	Xinzheng City	13	Late Western Zhou	1046-771 BC	N	XH-M104	-10.4	8.9
NCP	Xinzheng City	13	Late Western Zhou	1046-771 BC	N	XH-M128	-11.2	8.8
NCP	Xinzheng City	13	Spring/Autumn Period	770-476 BC	N	TP-M24	-12.7	7
NCP	Xinzheng City	13	Spring/Autumn Period	770-476 BC	N	TP-M40	-10.2	9.2
NCP	Xinzheng City	13	Spring/Autumn Period	770-476 BC	N	TP-M48	-10.6	8.7
NCP	Xinzheng City	13	Spring/Autumn Period	770-476 BC	N	TP-M55	-11.5	8.4
NCP	Xinzheng City	13	Spring/Autumn Period	770-476 BC	N	XH-M1	-11.1	8.6
NCP	Xinzheng City	13	Spring/Autumn Period	770-476 BC	N	XH-M11	-9.3	10.2
NCP	Xinzheng City	13	Spring/Autumn Period	770-476 BC	N	XH-M21	-10.9	8.2
NCP	Xinzheng City	13	Spring/Autumn Period	770-476 BC	N	XH-M22	-9.7	8.1
NCP	Xinzheng City	13	Spring/Autumn Period	770-476 BC	N	XH-M28	-10.7	8.7
NCP	Xinzheng City	13	Spring/Autumn Period	770-476 BC	N	XH-M29	-10.3	9.1
NCP	Xinzheng City	13	Spring/Autumn Period	770-476 BC	N	XH-M31	-10.8	8.7
NCP	Xinzheng City	13	Spring/Autumn Period	770-476 BC	N	XH-M35	-10.5	9.8
NCP	Xinzheng City	13	Spring/Autumn Period	770-476 BC	N	XH-M39	-10.4	8.8
NCP	Xinzheng City	13	Spring/Autumn Period	770-476 BC	N	XH-M41	-10	9.7
NCP	Xinzheng City	13	Spring/Autumn Period	770-476 BC	N	XH-M51	-11.8	8.9
NCP	Xinzheng City	13	Spring/Autumn Period	770-476 BC	N	XH-M52	-9.2	9.1
NCP	Xinzheng City	13	Spring/Autumn Period	770-476 BC	N	XH-M53	-12.1	8
NCP	Xinzheng City	13	Spring/Autumn Period	770-476 BC	N	XH-M56	-10.1	8.2
NCP	Xinzheng City	13	Spring/Autumn Period	770-476 BC	N	XH-M60	-11.4	8.9
NCP	Xinzheng City	13	Spring/Autumn Period	770-476 BC	N	XH-M63	-10.4	8.7
NCP	Xinzheng City	13	Spring/Autumn Period	770-476 BC	N	XH-M64	-9.5	9.5
NCP	Xinzheng City	13	Spring/Autumn Period	770-476 BC	N	XH-M92	-11.5	9
NCP	Xinzheng City	13	Spring/Autumn Period	770-476 BC	N	XH-M103	-9	10
NCP	Xinzheng City	13	Spring/Autumn Period	770-476 BC	N	XH-M112	-9.3	9.3
NCP	Xinzheng City	13	Spring/Autumn Period	770-476 BC	N	XH-M123	-8	10
NCP	Xinzheng City	13	Spring/Autumn Period	770-476 BC	N	XH-M125	-10	9.6
NCP	Xinzheng City	13	Spring/Autumn Period	770-476 BC	N	XH-M126	-10.3	9.4
NCP	Xinzheng City	13	Spring/Autumn Period	770-476 BC	N	XH-M127	-10.1	8.2
NCP	Xinzheng City	13	Spring/Autumn Period	770-476 BC	N	XH-M133	-11.7	7.7
NCP	Xinzheng City	13	Spring/Autumn Period	770-476 BC	N	XH-M140	-10.1	10.4
NCP	Yangdi	13	Early Eastern Zhou	770-221 BC	N	YY-M5	-18.4	10.8
NCP	Yangdi	13	Early Eastern Zhou	770-221 BC	N	YY-M6	-19	10.6
NCP	Yangdi	13	Early Eastern Zhou	770-221 BC	N	YY-M7	-8.2	8.5
NCP	Yangdi	13	Early Eastern Zhou	770-221 BC	N	YY-M8	-8.1	7.4
NCP	Yangdi	13	Early Eastern Zhou	770-221 BC	N	YY-M9	-9.1	8.7
NCP	Chenjiagou	13.5	Eastern Zhou	770-221 BC	N	WC-M1	-12.7	8.2
NCP	Chenjiagou	13.5	Eastern Zhou	770-221 BC	N	WC-M3	-8.7	9.7
NCP	Chenjiagou	13.5	Eastern Zhou	770-221 BC	N	WC-M5	-11.1	8.5
NCP	Chenjiagou	13.5	Eastern Zhou	770-221 BC	N	WC-M6	-10.6	9.7
NCP	Chenjiagou	13.5	Eastern Zhou	770-221 BC	N	WC-M7	-9.4	7.9
NCP	Chenjiagou	13.5	Eastern Zhou	770-221 BC	N	WC-M8	-9.3	9.1
NCP	Chenjiagou	13.5	Eastern Zhou	770-221 BC	N	WC-M9	-9.7	8.4
NCP	Chenjiagou	13.5	Eastern Zhou	770-221 BC	N	WC-M10	-8.2	8.9
NCP	Chenjiagou	13.5	Eastern Zhou	770-221 BC	N	WC-M13	-9.8	8.1
NCP	Chenjiagou	13.5	Eastern Zhou	770-221 BC	N	WC-M14	-8.9	9.5
NCP	Chenjiagou	13.5	Eastern Zhou	770-221 BC	N	WC-M15	-9.3	8.6
NCP	Chenjiagou	13.5	Eastern Zhou	770-221 BC	N	WC-M17	-8.9	8.8
NCP	Chenjiagou	13.5	Eastern Zhou	770-221 BC	N	WC-M18	-9.2	7.6
NCP	Chenjiagou	13.5	Eastern Zhou	770-221 BC	N	WC-M20	-11.6	10
NCP	Chenjiagou	13.5	Eastern Zhou	770-221 BC	N	WC-M23	-8.5	9
NCP	Chenjiagou	13.5	Eastern Zhou	770-221 BC	N	WC-M26	-8.9	9.9
NCP	Chenjiagou	13.5	Eastern Zhou	770-221 BC	N	WC-M27	-9.6	9.3
NCP	Chenjiagou	13.5	Eastern Zhou	770-221 BC	N	WC-M28	-9.1	8.3
NCP	Chenjiagou	13.5	Eastern Zhou	770-221 BC	N	WC-M31	-9.8	8.6
NCP	Chenjiagou	13.5	Eastern Zhou	770-221 BC	N	WC-M38	-9.4	8.7
NCP	Chenjiagou	13.5	Eastern Zhou	770-221 BC	N	WC-M39	-8.7	9.7
NCP	Chenjiagou	13.5	Eastern Zhou	770-221 BC	N	WC-M40	-8.9	10
NCP	Chenjiagou	13.5	Eastern Zhou	770-221 BC	N	WC-M41	-8.7	8.9
NCP	Chenjiagou	13.5	Eastern Zhou	770-221 BC	N	WC-M42	-8.5	10.3
NCP	Chenjiagou	13.5	Eastern Zhou	770-221 BC	N	WC-M44	-11.1	9.3
NCP	Chenjiagou	13.5	Eastern Zhou	770-221 BC	N	WC-M45	-9.2	10.1
NCP	Chenjiagou	13.5	Eastern Zhou	770-221 BC	N	WC-M46	-8	9.9
NCP	Chenjiagou	13.5	Eastern Zhou	770-221 BC	N	WC-M48	-8.1	10.2
NCP	Chenjiagou	13.5	Eastern Zhou	770-221 BC	N	WC-M50	-9.4	10
NCP	Chenjiagou	13.5	Eastern Zhou	770-221 BC	N	WC-M51	-10.6	9
NCP	Chenjiagou	13.5	Eastern Zhou	770-221 BC	N	WC-M52	-16.2	9
NCP	Chenjiagou	13.5	Eastern Zhou	770-221 BC	N	WC-M62	-8.3	10.3
NCP	Chenjiagou	13.5	Eastern Zhou	770-221 BC	N	WC-M71	-9.4	8.4
NCP	Chenjiagou	13.5	Eastern Zhou	770-221 BC	N	WC-M73	-9.5	10.6
NCP	Chenjiagou	13.5	Eastern Zhou	770-221 BC	N	WC-M79	-9.4	8.1
NCP	Chenjiagou	13.5	Eastern Zhou	770-221 BC	N	WC-M86	-10.3	9.5
NCP	Chenjiagou	13.5	Eastern Zhou	770-221 BC	N	WC-M90	-10.6	9.7
NCP	Chenjiagou	13.5	Eastern Zhou	770-221 BC	N	WC-M102	-9.6	9.4
NCP	Chenjiagou	13.5	Eastern Zhou	770-221 BC	N	WC-M108	-10.2	8.9
NCP	Qinglongquan	13.5	Eastern Zhou	770-221 BC	N	M9	-15.63	6.91
NCP	Qinglongquan	13.5	Eastern Zhou	770-221 BC	N	M39	-14.66	7.48
NCP	Qinglongquan	13.5	Eastern Zhou	770-221 BC	N	M144	-15.77	7.16
NCP	Qinglongquan	13.5	Eastern Zhou	770-221 BC	N	M21	-14.61	6.42
NCP	Qinglongquan	13.5	Eastern Zhou	770-221 BC	N	M178	-12.68	7.8
NCP	Qinglongquan	13.5	Eastern Zhou	770-221 BC	N	M103	-12.87	9.33
NCP	Qinglongquan	13.5	Eastern Zhou	770-221 BC	N	M168	-15.3	6.26
NCP	Qinglongquan	13.5	Eastern Zhou	770-221 BC	N	M21 Fill	-15.13	6.58
NCP	Qinglongquan	13.5	Eastern Zhou	770-221 BC	N	M124	-14.26	6.04
NCP	Xinzheng City	13.5	Eastern Zhou	770-221 BC	N	TP-M36	-9.4	9.3
NCP	Xinzheng City	13.5	Eastern Zhou	770-221 BC	N	TP-M58	-12	8.1
NCP	Xinzheng City	13.5	Eastern Zhou	770-221 BC	N	XH-M36	-9.9	8.1
NCP	Xinzheng City	13.5	Eastern Zhou	770-221 BC	N	XH-M48	-12.3	8.7
NCP	Xinzheng City	13.5	Eastern Zhou	770-221 BC	N	XH-M59	-9.2	10.1
NCP	Xinzheng City	13.5	Eastern Zhou	770-221 BC	N	XH-M80	-11.2	9.4
NCP	Xinzheng City	13.5	Eastern Zhou	770-221 BC	N	XH-M83	-13.6	8.4
NCP	Xinzheng City	13.5	Eastern Zhou	770-221 BC	N	XH-M87	-15.6	7.5
NCP	Xinzheng City	13.5	Eastern Zhou	770-221 BC	N	XH-M89	-15.4	8.4
NCP	Xinzheng City	13.5	Eastern Zhou	770-221 BC	N	XH-M90	-12.2	8.2
NCP	Xinzheng City	13.5	Eastern Zhou	770-221 BC	N	XH-M93	-9.1	10.3
NCP	Xinzheng City	13.5	Eastern Zhou	770-221 BC	N	XH-M98	-10.4	9
NCP	Xinzheng City	13.5	Eastern Zhou	770-221 BC	N	XH-M115	-11.8	8.3
NCP	Xinzheng City	13.5	Eastern Zhou	770-221 BC	N	XH-M116	-15.7	8.8
NCP	Xinzheng City	13.5	Eastern Zhou	770-221 BC	N	XH-M117	-13.8	7.3
NCP	Xinzheng City	13.5	Eastern Zhou	770-221 BC	N	XH-M122	-8.5	9.9
NCP	Xinzheng City	13.5	Eastern Zhou	770-221 BC	N	XH-M136	-10.9	8.8
NCP	Xinzheng City	13.5	Eastern Zhou	770-221 BC	N	XH-M137	-10	9.1
NCP	Xinzheng City	13.5	Eastern Zhou	770-221 BC	N	XH-M149	-12.4	8.3
NCP	Xinzheng City	13.5	Eastern Zhou	770-221 BC	N	XH-M150	-12.5	7.2
NCP	Shenmingpu	14	Warring States	480-221 BC	N	SMP-M2	-14	7.8
NCP	Shenmingpu	14	Warring States	480-221 BC	N	SMP-M152	-11.5	9.6
NCP	Shenmingpu	14	Warring States	480-221 BC	N	SMP-M122	-12.3	9.3
NCP	Shenmingpu	14	Warring States	480-221 BC	N	SMP-M145	-13.3	10.4
NCP	Shenmingpu	14	Warring States	480-221 BC	N	SMP-M93	-12.8	7.4
NCP	Shenmingpu	14	Warring States	480-221 BC	N	SMP-M94	-12.5	6.8
NCP	Shenmingpu	14	Warring States	480-221 BC	N	SMP-M43	-13.3	9.2
NCP	Shenmingpu	14	Warring States	480-221 BC	N	SMP-M101	-12.7	10.2
NCP	Shenmingpu	14	Warring States	480-221 BC	N	SMP-M49	-13.1	9.2
NCP	Shenmingpu	14	Warring States	480-221 BC	N	SMP-M159	-11.7	8.7
NCP	Shenmingpu	14	Warring States	480-221 BC	N	SMP-M137	-13.5	6.2
NCP	Shenmingpu	14	Warring States	480-221 BC	N	SMP-M48	-13.4	9.2
NCP	Shenmingpu	14	Warring States	480-221 BC	N	SMP-M20	-12	8.7
NCP	Shenmingpu	14	Warring States	480-221 BC	N	SMP-M123	-11.6	9.6
NCP	Xinzheng City	14	Warring States	480-221 BC	N	TP-M5	-11.4	9.4
NCP	Xinzheng City	14	Warring States	480-221 BC	N	TP-M27	-13.2	7.7
NCP	Xinzheng City	14	Warring States	480-221 BC	N	TP-M56	-11.3	7.9
NCP	Xinzheng City	14	Warring States	480-221 BC	N	XH-M3	-12	9
NCP	Xinzheng City	14	Warring States	480-221 BC	N	XH-M19	-11.1	9.4
NCP	Xinzheng City	14	Warring States	480-221 BC	N	XH-M30	-10	9.9
NCP	Xinzheng City	14	Warring States	480-221 BC	N	XH-M45	-12.8	8.1
NCP	Xinzheng City	14	Warring States	480-221 BC	N	XH-M46	-14.4	8.5
NCP	Xinzheng City	14	Warring States	480-221 BC	N	XH-M54	-12.5	8.7
NCP	Xinzheng City	14	Warring States	480-221 BC	N	XH-M57	-11.5	8.5
NCP	Xinzheng City	14	Warring States	480-221 BC	N	XH-M69	-9.5	9
NCP	Xinzheng City	14	Warring States	480-221 BC	N	XH-M71	-11.9	8.3
NCP	Xinzheng City	14	Warring States	480-221 BC	N	XH-M73	-13.1	8.6
NCP	Xinzheng City	14	Warring States	480-221 BC	N	XH-M113	-11	8
NCP	Xinzheng City	14	Warring States	480-221 BC	N	XH-M145	-10.8	8.2
NCP	Xinzheng City	14	Warring States	480-221 BC	N	XH-M152	-9.5	9.8
NCP	Shenmingpu	14.5	Western Han	141 BC - 24 AD	N	M25	-18.1	9.3
NCP	Shenmingpu	14.5	Western Han	141 BC - 24 AD	N	M51	-16.1	8.2
NCP	Shenmingpu	14.5	Western Han	141 BC - 24 AD	N	M50	-15.8	8.2
NCP	Shenmingpu	14.5	Western Han	141 BC - 24 AD	N	M34	-12.1	10.2
NCP	Shenmingpu	14.5	Western Han	141 BC - 24 AD	N	M36	-12.4	10.2
NCP	Shenmingpu	14.5	Western Han	141 BC - 24 AD	N	M18	-17.2	8
NCP	Shenmingpu	14.5	Western Han	141 BC - 24 AD	N	M158a	-17	7.8
NCP	Shenmingpu	14.5	Western Han	141 BC - 24 AD	N	M158b	-15.6	8.6
NCP	Shenmingpu	14.5	Western Han	141 BC - 24 AD	N	M91	-16.4	6.6
NCP	Shenmingpu	14.5	Western Han	141 BC - 24 AD	N	M42	-16.6	8.1
NCP	Shenmingpu	14.5	Western Han	141 BC - 24 AD	N	M83	-16.3	8.1
NCP	Shenmingpu	14.5	Western Han	141 BC - 24 AD	N	M136	-15.8	8.5
NCP	Shenmingpu	14.5	Western Han	141 BC - 24 AD	N	M37	-17.1	8
NCP	Shenmingpu	14.5	Western Han	141 BC - 24 AD	N	M143	-16.8	8
NCP	Xuecun	14.5	Western Han	141 BC - 24 AD	N	XC1-M17:E	-12.5	12.1
NCP	Xuecun	14.5	Western Han	141 BC - 24 AD	N	XC1-M25:W	-14.1	11.8
NCP	Xuecun	14.5	Western Han	141 BC - 24 AD	N	XC1-M57	-13.8	11.5
NCP	Xuecun	14.5	Western Han	141 BC - 24 AD	N	XC2-M168	-13.6	10.7
NCP	Xuecun	14.5	Western Han	141 BC - 24 AD	N	XC2-M217	-13.2	11.3
NCP	Xuecun	14.5	Western Han	141 BC - 24 AD	N	XC4-M45	-15.2	9.3
NCP	Xuecun	14.5	Western Han	141 BC - 24 AD	N	XC4-M59	-13.1	10.8
NCP	Xuecun	14.5	Western Han	141 BC - 24 AD	N	XC4-M91	-14.2	10.4
NCP	Xuecun	14.5	Western Han	141 BC - 24 AD	N	XC4-M92	-13.9	10.1
NCP	Xuecun	14.5	Western Han	141 BC - 24 AD	N	XC4-M96	-13.9	9.3
NCP	Xuecun	14.5	Western Han	141 BC - 24 AD	N	XC4-M100	-12.7	11.7
NCP	Xuecun	14.5	Western Han	141 BC - 24 AD	N	XC4-M108	-12.6	9.3
NCP	Xuecun	14.5	Western Han	141 BC - 24 AD	N	XC4-M111:W	-14	10.7
NCP	Xuecun	14.5	Western Han	141 BC - 24 AD	N	XC4-M111:E	-15	10.4
NCP	Xuecun	14.5	Western Han	141 BC - 24 AD	N	XC4-M114	-15.5	10.6
NCP	Shenmingpu	15	Eastern Han	25-220 AD	N	M39	-17.3	8.3
NCP	Shenmingpu	15	Eastern Han	25-220 AD	N	M24	-16.8	8.1
NCP	Shenmingpu	15	Eastern Han	25-220 AD	N	M102	-13.7	7.3
NCP	Shenmingpu	15	Eastern Han	25-220 AD	N	M4	-18	8.9
NCP	Xuecun	15	Eastern Han	25-220 AD	N	XC1-M11:E	-13.2	10.4
NCP	Xuecun	15	Eastern Han	25-220 AD	N	XC1-M11:B	-13.5	10
NCP	Xuecun	15	Eastern Han	25-220 AD	N	XC1-M15	-8.8	9.6
NCP	Xuecun	15	Eastern Han	25-220 AD	N	XC1-M20	-14.2	15.9
NCP	Xuecun	15	Eastern Han	25-220 AD	N	XC1-M29:S	-12.5	9.4
NCP	Xuecun	15	Eastern Han	25-220 AD	N	XC1-M59	-15.1	8.8
NCP	Xuecun	15	Eastern Han	25-220 AD	N	XC1-M63	-13.6	10.8
NCP	Xuecun	15	Eastern Han	25-220 AD	N	XC1-M76:W	-13.1	10
NCP	Xuecun	15	Eastern Han	25-220 AD	N	XC2-M5:1	-13.6	10.1
NCP	Xuecun	15	Eastern Han	25-220 AD	N	XC2-M5:2	-13	10.6
NCP	Xuecun	15	Eastern Han	25-220 AD	N	XC2-M5:3S	-13.3	10.6
NCP	Xuecun	15	Eastern Han	25-220 AD	N	XC2-M5:4S	-14.2	10.4
NCP	Xuecun	15	Eastern Han	25-220 AD	N	XC2-M11	-16.1	11.1
NCP	Xuecun	15	Eastern Han	25-220 AD	N	XC2-M43:R	-15.4	9.4
NCP	Xuecun	15	Eastern Han	25-220 AD	N	XC2-M50:L	-13.4	11
NCP	Xuecun	15	Eastern Han	25-220 AD	N	XC2-M50:R	-12.9	14
NCP	Xuecun	15	Eastern Han	25-220 AD	N	XC2-M80:L	-12.2	10.7
NCP	Xuecun	15	Eastern Han	25-220 AD	N	XC2-M80:R	-12.3	13.5
NCP	Xuecun	15	Eastern Han	25-220 AD	N	XC2-M134	-13.5	10.3
NCP	Xuecun	15	Eastern Han	25-220 AD	N	XC2-M206:N	-12.2	9.8
NCP	Xuecun	15	Eastern Han	25-220 AD	N	XC2-M206:S	-14.3	9.2
NCP	Xuecun	15	Eastern Han	25-220 AD	N	XC2-M281:E	-12.7	9.6
NCP	Xuecun	15	Eastern Han	25-220 AD	N	XC2-M281:BE	-13.1	9.7
NCP	Xuecun	15	Eastern Han	25-220 AD	N	XC2-M281:BW	-13.4	12.4
NCP	Xuecun	15	Eastern Han	25-220 AD	N	XC3-M1	-14.6	10.5
NCP	Xuecun	15	Eastern Han	25-220 AD	N	XC3-M14	-14.9	9.4
NCP	Xuecun	15	Eastern Han	25-220 AD	N	XC4-M1	-14.1	9.7
NCP	Xuecun	15	Eastern Han	25-220 AD	N	XC4-M3:E	-13.9	10.7
NCP	Xuecun	15	Eastern Han	25-220 AD	N	XC4-M10:N	-13.5	10.1
NCP	Xuecun	15	Eastern Han	25-220 AD	N	XC4-M10:S	-15.1	9.5
NCP	Xuecun	15	Eastern Han	25-220 AD	N	XC4-M56:N1	-13.4	11.8
NCP	Xuecun	15	Eastern Han	25-220 AD	N	XC4-M55:N2	-14.3	10.8
NCP	Xuecun	15	Eastern Han	25-220 AD	N	XC4-M62	-13.1	9.9
NCP	Xuecun	15	Eastern Han	25-220 AD	N	XC4-M66	-13.1	11.3
NCP	Xuecun	15	Eastern Han	25-220 AD	N	XC4-M84	-15.9	10.4
NCP	Xuecun	15	Eastern Han	25-220 AD	N	XC4-M99	-14.1	10
NCP	Xuecun	15	Eastern Han	141 BC - 220 AD	N	XC2-M17	-14.3	10.1
NCP	Xuecun	15	Eastern Han	141 BC - 220 AD	N	XC4-M74	-14.3	9.9
QJ	Beiliu	2.5	Laoguantai Culture	8000-7000 BP	N	M4	-12.8	8.92
QJ	Beiliu	2.5	Laoguantai Culture	8000-7000 BP	N	M11	-13.47	9.01
QJ	Beiliu	2.5	Laoguantai Culture	8000-7000 BP	N	M17	-13	9.99
QJ	Beiliu	2.5	Laoguantai Culture	8000-7000 BP	N	M7	-10.39	8.89
QJ	Beiliu	2.5	Laoguantai Culture	8000-7000 BP	N	M16	-11.54	8.41
QJ	Baijia	4	Laoguantai Culture	5709-5389 BC	Y	Si1596	-14.5	11.1
QJ	Banpo	5	Banpo Culture	6800-5300 BP	N	04	-15	9.05
QJ	Jiangzhai I	5	Banpo Culture	6900-6500 BP	N	03	-9.93	8.89
QJ	Jiangzhai I	5	Banpo Culture	6900-6500 BP	N	01	-8.59	9.12
QJ	Jiangzhai I	5	Banpo Culture	6900-6500 BP	N	M52	-8.5	8.1
QJ	Jiangzhai I	5	Banpo Culture	6900-6500 BP	N	M96	-10.7	9.7
QJ	Jiangzhai I	5	Banpo Culture	6900-6500 BP	N	M149	-9.1	8.2
QJ	Jiangzhai I	5	Banpo Culture	6900-6500 BP	N	M181:1	-10	9.6
QJ	Jiangzhai I	5	Banpo Culture	6900-6500 BP	N	M186	-9	8.1
QJ	Jiangzhai II	6	Shijia Culture	6500-6000 BP	N	02	-11.21	9.18
QJ	Jiangzhai II	6	Shijia Culture	6500-6000 BP	N	08	-9.6	8.37
QJ	Jiangzhai II	6	Shijia Culture	6500-6000 BP	N	06	-10.68	8.34
QJ	Jiangzhai II	6	Shijia Culture	6500-6000 BP	N	M75	-9.7	8.6
QJ	Jiangzhai II	6	Shijia Culture	6500-6000 BP	N	M84:10	-10.9	8.8
QJ	Jiangzhai II	6	Shijia Culture	6500-6000 BP	N	M112:1	-8.8	7.8
QJ	Jiangzhai II	6	Shijia Culture	6500-6000 BP	N	M112:10	-8.7	8.4
QJ	Jiangzhai II	6	Shijia Culture	6500-6000 BP	N	M112:11	-9.8	8.1
QJ	Jiangzhai II	6	Shijia Culture	6500-6000 BP	N	M195:30	-11.5	8.3
QJ	Jiangzhai II	6	Shijia Culture	6500-6000 BP	N	M202:36	-8.9	8.2
QJ	Shijia	6	Shijia Culture	6300-6000 BP	N	12	-9.05	7.31
QJ	Shijia	6	Shijia Culture	6300-6000 BP	N	05	-10.03	7.73
QJ	Shijia	6	Shijia Culture	6300-6000 BP	N	09	-10.38	7.98
QJ	Shijia	6	Shijia Culture	6300-6000 BP	N	10	-10.51	8.83
QJ	Shijia	6	Shijia Culture	6300-6000 BP	N	11	-9.2	7.91
QJ	Shijia	6	Shijia Culture	6300-6000 BP	N	07	-11.19	8.21
QJ	Shijia	6	Shijia Culture	6300-6000 BP	N	13	-10.21	8.08
QJ	Shijia	6	Shijia Culture	6300-6000 BP	N	15	-10.15	8.55
QJ	Shijia	6	Shijia Culture	6300-6000 BP	N	16	-9.5	8.29
QJ	Beiliu	7	Miaodigou Culture	6000-5500 BP	N	M10	-10.28	8.16
QJ	Beiliu	7	Miaodigou Culture	6000-5500 BP	N	M9	-11.79	9.35
QJ	Beiliu	7	Miaodigou Culture	6000-5500 BP	N	M1	-10.2	8.64
QJ	Beiliu	7	Miaodigou Culture	6000-5500 BP	N	M8	-12.44	8.47
QJ	Xipo	7	Yangshao Culture	3300-3000 BC	Y	SP1701	-8.887	8.75
QJ	Xipo	7	Yangshao Culture	3300-3000 BC	Y	SP1702	-8.265	8.8
QJ	Xipo	7	Yangshao Culture	3300-3000 BC	Y	SP1703	-11.952	12.65
QJ	Xipo	7	Yangshao Culture	3300-3000 BC	Y	SP1704	-8.916	9
QJ	Xipo	7	Yangshao Culture	3300-3000 BC	Y	SP1705	-9.733	8.18
QJ	Xipo	7	Yangshao Culture	3300-3000 BC	Y	SP1706	-9.789	9.43
QJ	Xipo	7	Yangshao Culture	3300-3000 BC	Y	SP1707	-8.712	9.23
QJ	Xipo	7	Yangshao Culture	3300-3000 BC	Y	SP1708	-7.95	9.85
QJ	Xipo	7	Yangshao Culture	3300-3000 BC	Y	SP1710	-9.541	10.21
QJ	Xipo	7	Yangshao Culture	3300-3000 BC	Y	SP1712	-8.343	9.65
QJ	Xipo	7	Yangshao Culture	3300-3000 BC	Y	SP1713	-10.858	11.45
QJ	Xipo	7	Yangshao Culture	3300-3000 BC	Y	SP1714	-11.341	9.61
QJ	Xipo	7	Yangshao Culture	3300-3000 BC	Y	SP1715	-9.765	9.24
QJ	Xipo	7	Yangshao Culture	3300-3000 BC	Y	SP1716	-10.115	9.14
QJ	Xipo	7	Yangshao Culture	3300-3000 BC	Y	SP1717	-9.63	9.29
QJ	Xipo	7	Yangshao Culture	3300-3000 BC	Y	SP1718	-9.866	9.37
QJ	Xipo	7	Yangshao Culture	3300-3000 BC	Y	SP1719	-9.608	6.85
QJ	Xipo	7	Yangshao Culture	3300-3000 BC	Y	SP1720	-7.907	8.78
QJ	Xipo	7	Yangshao Culture	3300-3000 BC	Y	SP1721	-8.263	9.47
QJ	Xipo	7	Yangshao Culture	3300-3000 BC	Y	SP1722	-8.201	8.59
QJ	Xipo	7	Yangshao Culture	3300-3000 BC	Y	SP1723	-9.149	8.74
QJ	Xipo	7	Yangshao Culture	3300-3000 BC	Y	SP1724	-9.568	9.83
QJ	Xipo	7	Yangshao Culture	3300-3000 BC	Y	SP1725	-10.224	10.78
QJ	Xipo	7	Yangshao Culture	3300-3000 BC	Y	SP1726	-10.153	9.05
QJ	Xipo	7	Yangshao Culture	3300-3000 BC	Y	SP1727	-8.674	9.23
QJ	Xipo	7	Yangshao Culture	3300-3000 BC	Y	SP1728	-11.266	9.45
QJ	Xipo	7	Yangshao Culture	3300-3000 BC	Y	SP1729	-9.956	10.83
QJ	Xipo	7	Yangshao Culture	3300-3000 BC	Y	SP1731	-10.868	9.51
QJ	Xipo	7	Yangshao Culture	3300-3000 BC	Y	SP1732	-9.843	8.73
QJ	Xipo	7	Yangshao Culture	3300-3000 BC	Y	SP1733	-9.451	9.57
QJ	Qiangliang Temple	8	Miaodigou Culture	3300-3000 BC	Y	M33	-10.07	7.93
QJ	Qiangliang Temple	8	Miaodigou Culture	3300-3000 BC	Y	M34	-9.83	7.06
QJ	Qiangliang Temple	8	Miaodigou Culture	3300-3000 BC	Y	M37	-10.1	7.46
QJ	Qiangliang Temple	8	Miaodigou Culture	3300-3000 BC	Y	M45	-7.87	9.5
QJ	Qiangliang Temple	8	Miaodigou Culture	3300-3000 BC	Y	M48	-8.01	9.11
QJ	Qiangliang Temple	8	Miaodigou Culture	3300-3000 BC	Y	M64	-7.86	7.45
QJ	Qiangliang Temple	8	Miaodigou Culture	3300-3000 BC	Y	M76	-9.29	10.57
QJ	Qiangliang Temple	8	Miaodigou Culture	3300-3000 BC	Y	M79B	-7.62	6.48
QJ	Qiangliang Temple	8	Miaodigou Culture	3300-3000 BC	Y	M79C	-7.26	7.67
QJ	Qiangliang Temple	8	Miaodigou Culture	3300-3000 BC	Y	M80	-7.93	8.55
QJ	Qiangliang Temple	8	Miaodigou Culture	3300-3000 BC	Y	M97	-7.9	7.72
QJ	Qiangliang Temple	8	Miaodigou Culture	3300-3000 BC	Y	M243	-8.11	8.54
QJ	Qiangliang Temple	8	Miaodigou Culture	3300-3000 BC	Y	M256	-7.12	7.87
QJ	Dongying-2	10	Kexingzhuang II Culture	4600-4000 BP	Y	2#(4)H71:1	-6.8	9
QJ	Dongying-2	10	Kexingzhuang II Culture	4600-4000 BP	Y	2#(4)H71:2	-6.7	9.1
QJ	Dongying-2	10	Kexingzhuang II Culture	4600-4000 BP	Y	T2309(2)H50:15	-8.3	9.6
QJ	Dongying-2	10	Kexingzhuang II Culture	4600-4000 BP	Y	T1403(3)h5	-9.9	9.8
QJ	Dongying-2	10	Kexingzhuang II Culture	4600-4000 BP	Y	T2309(2)H50:16	-8.4	9.4
QJ	Qiangliang Temple	10	Longshan Culture	2300-1800 BC	N	M22	-7.3	8.8
QJ	Qiangliang Temple	10	Longshan Culture	2300-1800 BC	N	M30	-8.6	10
QJ	Qiangliang Temple	10	Longshan Culture	2300-1800 BC	N	M52	-7.2	9.2
QJ	Qiangliang Temple	10	Longshan Culture	2300-1800 BC	N	M57	-7.8	9.4
QJ	Qiangliang Temple	10	Longshan Culture	2300-1800 BC	N	M70A	-7.2	7.7
QJ	Qiangliang Temple	10	Longshan Culture	2300-1800 BC	N	M75	-8.2	8.8
QJ	Qiangliang Temple	10	Longshan Culture	2300-1800 BC	N	M146	-7.9	6.1
QJ	Qiangliang Temple	10	Longshan Culture	2300-1800 BC	N	M155	-7.6	9.3
QJ	Qiangliang Temple	10	Longshan Culture	2300-1800 BC	N	M155	-7.2	8.2
QJ	Qiangliang Temple	10	Longshan Culture	2300-1800 BC	N	M171	-8.1	8.6
QJ	Qiangliang Temple	10	Longshan Culture	2300-1800 BC	N	M190	-7.6	8.8
QJ	Qiangliang Temple	10	Longshan Culture	2300-1800 BC	N	M216	-8.4	9.4
QJ	Qiangliang Temple	10	Longshan Culture	2300-1800 BC	N	M220	-8	9.3
QJ	Qiangliang Temple	10	Longshan Culture	2300-1800 BC	N	M241	-9.2	9.8
QJ	Neiyangyuan	11	Xia	2070-1600 BC	N	XNM28	-7.28	8.37
QJ	Neiyangyuan	11	Xia	2070-1600 BC	N	XNM77	-7.35	8.5
QJ	Niedian	11	Xia	2070-1600 BC	N	M44	-7.1	11
QJ	Niedian	11	Xia	2070-1600 BC	N	M47	-6.7	11
QJ	Niedian	11	Xia	2070-1600 BC	N	M48	-7.4	9
QJ	Niedian	11	Xia	2070-1600 BC	N	M50	-6.9	10.6
QJ	Niedian	11	Xia	2070-1600 BC	N	M51	-7.5	9.5
QJ	Niedian	11	Xia	2070-1600 BC	N	M54	-7.6	11
QJ	Niedian	11	Xia	2070-1600 BC	N	M58	-7.1	10.9
QJ	Niedian	11	Xia	2070-1600 BC	N	M59	-7.2	10.6
QJ	Niedian	11	Xia	2070-1600 BC	N	M60	-6.7	11.6
QJ	Niedian	11	Xia	2070-1600 BC	N	M61	-6.8	10.4
QJ	Niedian	11	Xia	2070-1600 BC	N	M65	-7.6	11.3
QJ	Niedian	11	Xia	2070-1600 BC	N	M68	-7.2	10.2
QJ	Niedian	11	Xia	2070-1600 BC	N	M74	-6.9	10.3
QJ	Niedian	11	Xia	2070-1600 BC	N	M75	-6.7	10.9
QJ	Niedian	11	Xia	2070-1600 BC	N	M76	-7.6	10.4
QJ	Niedian	11	Xia	2070-1600 BC	N	M77	-6.9	10.4
QJ	Niedian	11	Xia	2070-1600 BC	N	M78	-7.9	8.5
QJ	Niedian	11	Xia	2070-1600 BC	N	M80	-6.4	11.7
QJ	Niedian	11	Xia	2070-1600 BC	N	M81	-7	10.3
QJ	Niedian	11	Xia	2070-1600 BC	N	M82	-7.1	10.3
QJ	Niedian	11	Xia	2070-1600 BC	N	M84	-7.5	10.7
QJ	Niedian	11	Xia	2070-1600 BC	N	M87	-7.6	11.1
QJ	Niedian	11	Xia	2070-1600 BC	N	M92	-7	10
QJ	Niedian	11	Xia	2070-1600 BC	N	M96	-6.8	9.8
QJ	Niedian	11	Xia	2070-1600 BC	N	M101	-6.9	10.6
QJ	Niedian	11	Xia	2070-1600 BC	N	M103	-7.2	11.4
QJ	Niedian	11	Xia	2070-1600 BC	N	M105	-6.6	10.5
QJ	Niedian	11	Xia	2070-1600 BC	N	M107	-6.9	10.5
QJ	Niedian	11	Xia	2070-1600 BC	N	M109	-7.2	10.5
QJ	Niedian	11	Xia	2070-1600 BC	N	M111	-7.3	10.6
QJ	Niedian	11	Xia	2070-1600 BC	N	M113	-7.4	9.7
QJ	Niedian	11	Xia	2070-1600 BC	N	M118	-7.1	10.3
QJ	Niedian	11	Xia	2070-1600 BC	N	M123	-7.1	11.1
QJ	Niedian	11	Xia	2070-1600 BC	N	M139	-7.4	11.6
QJ	Niedian	11	Xia	2070-1600 BC	N	M140	-6.9	10.7
QJ	Niedian	11	Xia	2070-1600 BC	N	M144	-6.9	11.2
QJ	Niedian	11	Xia	2070-1600 BC	N	M153	-6.9	10.8
QJ	Niedian	11	Xia	2070-1600 BC	N	M157	-7.2	10.7
QJ	Niedian	11	Xia	2070-1600 BC	N	M160	-7	10.6
QJ	Niedian	11	Xia	2070-1600 BC	N	M162	-7	10
QJ	Niedian	11	Xia	2070-1600 BC	N	M163	-7.2	10.8
QJ	Niedian	11	Xia	2070-1600 BC	N	M166	-6.9	11.3
QJ	Niedian	11	Xia	2070-1600 BC	N	M168	-8	9.8
QJ	Niedian	11	Xia	2070-1600 BC	N	M169	-7.2	9.9
QJ	Niedian	11	Xia	2070-1600 BC	N	M170	-7.5	8.7
QJ	Niedian	11	Xia	2070-1600 BC	N	M171	-6.7	10.8
QJ	Niedian	11	Xia	2070-1600 BC	N	M172	-7.6	10.3
QJ	Niedian	11	Xia	2070-1600 BC	N	M174	-6.7	11.2
QJ	Niedian	11	Xia	2070-1600 BC	N	M175	-6.9	10.9
QJ	Niedian	11	Xia	2070-1600 BC	N	M178	-7.3	8.5
QJ	Niedian	11	Xia	2070-1600 BC	N	M179	-7	10.4
QJ	Niedian	11	Xia	2070-1600 BC	N	M182	-6.9	11.3
QJ	Niedian	11	Xia	2070-1600 BC	N	M183	-7.6	9.5
QJ	Niedian	11	Xia	2070-1600 BC	N	M187	-7.4	11
QJ	Niedian	11	Xia	2070-1600 BC	N	M193	-6.8	10.9
QJ	Niedian	11	Xia	2070-1600 BC	N	M194	-7	9.7
QJ	Niedian	11	Xia	2070-1600 BC	N	M195	-7.9	10
QJ	Niedian	11	Xia	2070-1600 BC	N	M198	-7.6	9.1
QJ	Niedian	11	Xia	2070-1600 BC	N	M205	-7.3	10.3
QJ	Niedian	11	Xia	2070-1600 BC	N	M210	-6.9	10.8
QJ	Liangdaicun	12	Western Zhou - Rui State	1200-1000 BC	N	LD-07HLM1	-7.67	9.19
QJ	Liangdaicun	12	Western Zhou - Rui State	1200-1000 BC	N	LD-07HLM529	-8.69	9.47
QJ	Liangdaicun	12	Western Zhou - Rui State	1200-1000 BC	N	LD-07HLM518	-8.25	9.31
QJ	Liangdaicun	12	Western Zhou - Rui State	1200-1000 BC	N	LD-07HLM4	-8.04	9.66
QJ	Liangdaicun	12	Western Zhou - Rui State	1200-1000 BC	N	LD-07HLM530	-8.73	9.4
QJ	Liangdaicun	12	Western Zhou - Rui State	1200-1000 BC	N	LD-07HLM18	-8.94	11.35
QJ	Liangdaicun	12	Western Zhou - Rui State	1200-1000 BC	N	LD-07HLM6	-9.36	9.39
QJ	Liangdaicun	12	Western Zhou - Rui State	1200-1000 BC	N	2009HLM1405:3	-8.65	9.4
QJ	Liangdaicun	12	Western Zhou - Rui State	1200-1000 BC	N	2009HLM1404:2	-7.92	10.29
QJ	Liangdaicun	12	Western Zhou - Rui State	1200-1000 BC	N	2009HLM1406:2	-8.13	9.41
QJ	Liangdaicun	12	Western Zhou - Rui State	1200-1000 BC	N	2009HLM1412:2	-7.96	9.94
QJ	Liangdaicun	12	Western Zhou - Rui State	1200-1000 BC	N	2009HLM1413:2	-8.33	9.92
QJ	Liangdaicun	12	Western Zhou - Rui State	1200-1000 BC	N	2010HLM1415:3	-8.1	9.14
QJ	Liangdaicun	12	Western Zhou - Rui State	1200-1000 BC	N	2009HLM1416:2	-7.94	10.42
QJ	Liangdaicun	12	Western Zhou - Rui State	1200-1000 BC	N	2009HLM292:2	-8.02	9.2
QJ	Liangdaicun	12	Western Zhou - Rui State	1200-1000 BC	N	2009HLM293:2	-8.14	9.13
QJ	Liangdaicun	12	Western Zhou - Rui State	1200-1000 BC	N	2009HLM294:2	-8.07	9.16
QJ	Liangdaicun	12	Western Zhou - Rui State	1200-1000 BC	N	2009HLM295 I:3	-14.45	7.82
QJ	Liangdaicun	12	Western Zhou - Rui State	1200-1000 BC	N	2009HLM295 II:3	-14.25	8.21
QJ	Liangdaicun	12	Western Zhou - Rui State	1200-1000 BC	N	2010HLM298:2	-8.08	10.09
QJ	Liangdaicun	12	Western Zhou - Rui State	1200-1000 BC	N	2009HLM299:2	-8.25	9.51
QJ	Liangdaicun	12	Western Zhou - Rui State	1200-1000 BC	N	2010HLM297:2	-7.93	8.93
QJ	Liangdaicun	12	Western Zhou - Rui State	1200-1000 BC	N	2009HLM33:!	-8.37	10.74
QJ	Liangdaicun	12	Western Zhou - Rui State	1200-1000 BC	N	2009HLM291:1	-9.03	10.22
QJ	Liangdaicun	12	Western Zhou - Rui State	1200-1000 BC	N	2009HLM296:1	-8.13	7.8
QJ	Liangdaicun	12	Western Zhou - Rui State	1200-1000 BC	N	2010HLM300:1	-8.28	11.29
QJ	Liangdaicun	12	Western Zhou - Rui State	1200-1000 BC	N	2009HLM1408:1	-8.4	9.81
QJ	Liangdaicun	12	Western Zhou - Rui State	1200-1000 BC	N	2009HLM1409:1	-8.31	10.01
QJ	Liangdaicun	12	Western Zhou - Rui State	1200-1000 BC	N	2010HLM1410:1	-9.44	8.45
QJ	Liangdaicun	12	Western Zhou - Rui State	1200-1000 BC	N	2009HLM1414:1	-8.01	9.93
QJ	Shigushan	12	Western Zhou	1200-1000 BC		13BSGS_M10	-9.8	9.41
QJ	Zhouyuan	12	Western Zhou	1200-1000 BC	N	04QZ_M18	-8.62	9.5
QJ	Zhouyuan	12	Western Zhou	1200-1000 BC	N	04QZ_TZM2	-9.24	10.29
QJ	Zhouyuan	12	Western Zhou	1200-1000 BC	N	06QFIIIA2M2	-10.49	8.55
QJ	Zhouyuan	12	Western Zhou	1200-1000 BC	N	07QFIIIA1TG1H63	-15.99	9.4
QJ	Zhouyuan	12	Western Zhou	1200-1000 BC	N	07QFIIIA1TG4H22(12)	-11.55	9.09
QJ	Zhouyuan	12	Western Zhou	1200-1000 BC	N	08QS_M2	-12.13	11.47
QJ	Zhouyuan	12	Western Zhou	1200-1000 BC	N	08QS_M9	-11.81	11.93
QJ	Zhouyuan	12	Western Zhou	1200-1000 BC	N	09QFIIIA2FYM68	-9.35	8.8
QJ	Zhouyuan	12	Western Zhou	1200-1000 BC	N	09QFIIIA2FYM82	-7.08	9.03
QJ	Zhouyuan	12	Western Zhou	1200-1000 BC	N	09QFIIIA2FYM148	-9.27	8.79
QJ	Zhouyuan	12	Western Zhou	1200-1000 BC	N	09QFIIIA2FYM85	-10.54	7.58
QJ	Zhouyuan	12	Western Zhou	1200-1000 BC	N	09QFIIIA2FYM80	-9.89	8.34
QJ	Zhouyuan	12	Western Zhou	1200-1000 BC	N	09QFIIIA2FYM52	-8.44	10.59
QJ	Zhouyuan	12	Western Zhou	1200-1000 BC	N	09QFIIIA2FYM68	-9.32	9.25
QJ	Zhouyuan	12	Western Zhou	1200-1000 BC	N	09QFIIIA2FYM75	-10.19	8.48
QJ	Zhouyuan	12	Western Zhou	1200-1000 BC	N	09QFIIIA2FYM152	-9.52	7.93
QJ	Zhouyuan	12	Western Zhou	1200-1000 BC	N	05QEFIIIA2M59	-9.6	12.29
QJ	Zhouyuan	12	Western Zhou	1200-1000 BC	N	05QEFIIIA2M27	-8.11	10.22
QJ	Zhouyuan	12	Western Zhou	1200-1000 BC	N	O4QZLIIIA2M18	-8.72	9.8
QJ	Zhouyuan	12	Western Zhou	1200-1000 BC	N	06QSM3	-8.45	8.92
QJ	Neiyangyuan	13	Spring/Autumn Period	770-476 BC	N	XNM4	-8.59	8.39
QJ	Neiyangyuan	13	Spring/Autumn Period	770-476 BC	N	XNM10	-8.11	10.1
QJ	Neiyangyuan	13	Spring/Autumn Period	770-476 BC	N	XNM24	-8.38	10.08
QJ	Neiyangyuan	13	Spring/Autumn Period	770-476 BC	N	XNM26	-8.13	8.83
QJ	Neiyangyuan	13	Spring/Autumn Period	770-476 BC	N	XNM32	-8.04	11.31
QJ	Neiyangyuan	13	Spring/Autumn Period	770-476 BC	N	XNM41	-7.55	11.7
QJ	Neiyangyuan	13	Spring/Autumn Period	770-476 BC	N	XNM42	-8.12	10.33
QJ	Neiyangyuan	13	Spring/Autumn Period	770-476 BC	N	XNM50	-15.36	9.88
QJ	Neiyangyuan	13	Spring/Autumn Period	770-476 BC	N	XNM58	-8.38	9.15
QJ	Neiyangyuan	13	Spring/Autumn Period	770-476 BC	N	XNM64	-8.03	9.47
QJ	Neiyangyuan	13	Spring/Autumn Period	770-476 BC	N	XNM66	-8.37	8.88
QJ	Neiyangyuan	13	Spring/Autumn Period	770-476 BC	N	XNM67	-8.3	9.41
QJ	Neiyangyuan	13	Spring/Autumn Period	770-476 BC	N	XNM69	-7.59	10.18
QJ	Neiyangyuan	13	Spring/Autumn Period	770-476 BC	N	XNM72	-9.97	10.45
QJ	Neiyangyuan	13	Spring/Autumn Period	770-476 BC	N	XNM74	-9.81	8.19
QJ	Neiyangyuan	13	Spring/Autumn Period	770-476 BC	N	XNM100	-8.98	7.93
QJ	Neiyangyuan	13	Spring/Autumn Period	770-476 BC	N	XNM103	-7.78	9.39
QJ	Sunjianantou	13.5	Eastern Zhou	770-221 BC	N	SF1	-14.62	8.4
QJ	Sunjianantou	13.5	Eastern Zhou	770-221 BC	N	SF2	-12.81	8.3
QJ	Sunjianantou	13.5	Eastern Zhou	770-221 BC	N	SF3	-9.87	8.69
QJ	Sunjianantou	13.5	Eastern Zhou	770-221 BC	N	SF4	-9.97	8.15
QJ	Sunjianantou	13.5	Eastern Zhou	770-221 BC	N	SF5	-10.64	7.37
QJ	Sunjianantou	13.5	Eastern Zhou	770-221 BC	N	SF6	-8.92	8.72
QJ	Sunjianantou	13.5	Eastern Zhou	770-221 BC	N	SF7	-9.23	11.84
QJ	Sunjianantou	13.5	Eastern Zhou	770-221 BC	N	SF8	-10.74	8.42
QJ	Sunjianantou	13.5	Eastern Zhou	770-221 BC	N	SF9	-12.42	8.96
QJ	Sunjianantou	13.5	Eastern Zhou	770-221 BC	N	SF10	-9.22	7.24
QJ	Sunjianantou	13.5	Eastern Zhou	770-221 BC	N	SF11	-11.33	7.58
QJ	Sunjianantou	13.5	Eastern Zhou	770-221 BC	N	SF12	-10.96	6.75
QJ	Sunjianantou	13.5	Eastern Zhou	770-221 BC	N	SF13	-10.19	7.68
QJ	Sunjianantou	13.5	Eastern Zhou	770-221 BC	N	SF14	-9.74	7.87
QJ	Sunjianantou	13.5	Eastern Zhou	770-221 BC	N	SF15	-10.78	9.37
QJ	Sunjianantou	13.5	Eastern Zhou	770-221 BC	N	SF16	-10.67	7.74
QJ	Sunjianantou	13.5	Eastern Zhou	770-221 BC	N	SF17	-10.18	8.53
QJ	Sunjianantou	13.5	Eastern Zhou	770-221 BC	N	SF18	-11.85	8.23
QJ	Sunjianantou	13.5	Eastern Zhou	770-221 BC	N	SF19	-11.56	8.25
QJ	Sunjianantou	13.5	Eastern Zhou	770-221 BC	N	SF20	-10.75	9.03
QJ	Sunjianantou	13.5	Eastern Zhou	770-221 BC	N	SF21	-10.76	8.85
QJ	Sunjianantou	13.5	Eastern Zhou	770-221 BC	N	SF22	-10.76	9.05
QJ	Sunjianantou	13.5	Eastern Zhou	770-221 BC	N	SF23	-11.98	8.53
QJ	Sunjianantou	13.5	Eastern Zhou	770-221 BC	N	SF24	-9.21	9.05
QJ	Sunjianantou	13.5	Eastern Zhou	770-221 BC	N	SF25	-10.32	8.7
QJ	Jianhe	14	Warring States	480-221 BC	N	JH-M1	-9.86	8.14
QJ	Jianhe	14	Warring States	480-221 BC	N	JH-M2	-8.28	9.14
QJ	Jianhe	14	Warring States	480-221 BC	N	JH-M6	-8.27	8.51
QJ	Jianhe	14	Warring States	480-221 BC	N	JH-M10	-9.24	9.08
QJ	Jianhe	14	Warring States	480-221 BC	N	JH-M11	-9.33	8.16
QJ	Jianhe	14	Warring States	480-221 BC	N	JH-M18	-9.22	8.82
QJ	Jianhe	14	Warring States	480-221 BC	N	JH-M24	-8.74	8.92
QJ	Jianhe	14	Warring States	480-221 BC	N	JH-M32	-8.19	9.39
QJ	Jianhe	14	Warring States	480-221 BC	N	JH-M34	-8.81	8.79
QJ	Jianhe	14	Warring States	480-221 BC	N	JH-M38	-9.02	8.88
QJ	Jianhe	14	Warring States	480-221 BC	N	JH-M45	-9.86	8.3
QJ	Jianhe	14	Warring States	480-221 BC	N	JH-M46	-9.49	8.64
QJ	Jianhe	14	Warring States	480-221 BC	N	JH-M47	-10.84	7.81
QJ	Jianhe	14	Warring States	480-221 BC	N	JH-M48	-9.25	9.08
QJ	Tunliu Yuwu	14	Warring States	480-221 BC	N	07TLM73	-8.7	8.4
QJ	Tunliu Yuwu	14	Warring States	480-221 BC	N	07TLM175	-9.8	9.2
QJ	Tunliu Yuwu	14	Warring States	480-221 BC	N	07TLM63	-8.3	9.3
QJ	Tunliu Yuwu	14	Warring States	480-221 BC	N	07TLM 65	-12.5	7.9
QJ	Tunliu Yuwu	14	Warring States	480-221 BC	N	07TLM114	-8.7	9.5
QJ	Tunliu Yuwu	14	Warring States	480-221 BC	N	07TLM117	-10.5	8.6
QJ	Guangming	14.5	Western Han	141 BC - 24 AD	N	GM M3	-8.6	10.3
QJ	Guangming	14.5	Western Han	141 BC - 24 AD	N	GM M74	-9.6	10.7
QJ	Guangming	14.5	Western Han	141 BC - 24 AD	N	GM M89	-9.1	10.9
QJ	Guangming	14.5	Western Han	141 BC - 24 AD	N	GM M516	-11	10
QJ	Guangming	14.5	Western Han	141 BC - 24 AD	N	GM M763	-10.8	11.6
QJ	Guangming	14.5	Western Han	141 BC - 24 AD	N	GM M720	-10	10.9
QJ	Guangming	14.5	Western Han	141 BC - 24 AD	N	GM M740	-9.7	12.5
QJ	Tunliu Yuwu	14.5	Western Han	141 BC - 24 AD	N	07TLM153	-8.7	8.6
QJ	Tunliu Yuwu	14.5	Western Han	141 BC - 24 AD	N	07TLM154	-8.7	8.9
QJ	Guandao	15	Mid WH to Late EH	141 BC - 220 AD	N	GDM12	-11.9	10.5
QJ	Guandao	15	Mid WH to Late EH	141 BC - 220 AD	N	GDM14	-10.3	10.4
QJ	Guandao	15	Mid WH to Late EH	141 BC - 220 AD	N	GDM30	-10.7	10.7
QJ	Guandao	15	Mid WH to Late EH	141 BC - 220 AD	N	GDM49	-9.8	10.1
QJ	Guandao	15	Mid WH to Late EH	141 BC - 220 AD	N	GDMx	-11	10.1
QJ	Jichang	15	Eastern Han	25-220 AD	N	JC M10	-11.5	9
QJ	Jichang	15	Eastern Han	25-220 AD	N	JC M10	-12.3	8.4
QJ	Jichang	15	Eastern Han	25-220 AD	N	JC M25	-11.7	8.9
QJ	Jichang	15	Eastern Han	25-220 AD	N	JC M25	-11.7	8.6
QJ	Jichang	15	Eastern Han	25-220 AD	N	JC M31	-11.9	9.1
QJ	Jichang	15	Eastern Han	25-220 AD	N	JC M31	-12.1	9.7
QJ	Jichang	15	Eastern Han	25-220 AD	N	JC M31	-12.5	10
QJ	Jichang	15	Eastern Han	25-220 AD	N	JC M40	-15.7	10.8
QJ	Jichang	15	Eastern Han	25-220 AD	N	JC M41	-12.2	8.8
QJ	Jichang	15	Eastern Han	25-220 AD	N	JC M43	-11.6	10.2
QJ	Jichang	15	Eastern Han	25-220 AD	N	JC M43	-12.6	8.2
QJ	Jichang	15	Eastern Han	25-220 AD	N	JC M43	-10.5	9.2
QJ	Jichang	15	Eastern Han	25-220 AD	N	JC M43	-13.2	10.2
QJ	Jichang	15	Eastern Han	25-220 AD	N	JC M43	-12	8.4
QJ	Jichang	15	Eastern Han	25-220 AD	N	JC M43	-11.2	10.1
QJ	Jichang	15	Eastern Han	25-220 AD	N	JC M44	-10.6	7.1
QJ	Jichang	15	Eastern Han	25-220 AD	N	JC M44	-10.6	9.1
QJ	Jichang	15	Eastern Han	25-220 AD	N	JC M46	-10.4	7.8
QJ	Jichang	15	Eastern Han	25-220 AD	N	JC M46	-11.4	9.7
QJ	Jichang	15	Eastern Han	25-220 AD	N	JC M50	-10.8	8.8
QJ	Jichang	15	Eastern Han	25-220 AD	N	JC M50	-11.3	8.2
QJ	Jichang	15	Eastern Han	25-220 AD	N	JC M51	-12.1	8.6
QJ	Jichang	15	Eastern Han	25-220 AD	N	JC M51	-12.1	8.8
QJ	Jichang	15	Eastern Han	25-220 AD	N	JC M51	-12.3	8.8
QJ	Jichang	15	Eastern Han	25-220 AD	N	JC M51	-12.8	8.4
QJ	Jichang	15	Eastern Han	25-220 AD	N	JC M81	-15.1	7.3
QJ	Jichang	15	Eastern Han	25-220 AD	N	JC M155	-13.3	10
QJ	Jichang	15	Eastern Han	25-220 AD	N	JC M160	-10.7	9.1
QJ	Jichang	15	Eastern Han	25-220 AD	N	JC M160	-11.1	8.7
QJ	Jichang	15	Eastern Han	25-220 AD	N	JC M208	-11.9	9
QJ	Tunliu Yuwu	15	Eastern Han	25-220 AD	N	07TLM7	-10.1	8.6
QJ	Tunliu Yuwu	15	Eastern Han	25-220 AD	N	07TLM3	-10.3	8.9
QJ	Tunliu Yuwu	15	Eastern Han	25-220 AD	N	07TLM9-1	-9.8	10.5
QJ	Tunliu Yuwu	15	Eastern Han	25-220 AD	N	07TLM9-2	-12.7	5.3
QJ	Tunliu Yuwu	15	Eastern Han	25-220 AD	N	07TLM13	-10	8.8
QJ	Tunliu Yuwu	15	Eastern Han	25-220 AD	N	07TLM16	-12.8	8.9
QJ	Tunliu Yuwu	15	Eastern Han	25-220 AD	N	07TLM5	-10.5	8.5
QJ	Tunliu Yuwu	15	Eastern Han	25-220 AD	N	07TLM6	-10	10.1
QJ	Tunliu Yuwu	15	Eastern Han	25-220 AD	N	07TLM9-3	-9.9	10.6
QJ	Tunliu Yuwu	15	Eastern Han	25-220 AD	N	07TLM4	-10.1	9.4
QJ	Tunliu Yuwu	15	Eastern Han	25-220 AD	N	07TLM10	-10.8	11.4
QJ	Tunliu Yuwu	15	Eastern Han	25-220 AD	N	07TLM21	-9.1	10.2
QJ	Tunliu Yuwu	15	Eastern Han	25-220 AD	N	07TLM133	-12.3	7.5
GQ	Hupo	10	Banshan-Machang	4164 ± 70 BP	Y	XZHP-2	-8.2	7.7
GQ	Hupo	10	Banshan-Machang	4164 ± 70 BP	Y	XZHP-4*	-9.3	7.6
GQ	Hupo	10	Banshan-Machang	4164 ± 70 BP	Y	XZHP-6	-8.8	7
GQ	Hupo	10	Banshan-Machang	4164 ± 70 BP	Y	XZHP-8	-9	7.9
GQ	Hupo	10	Banshan-Machang	4164 ± 70 BP	Y	XZHP-9	-8.7	7.4
GQ	Hupo	10	Banshan-Machang	4164 ± 70 BP	Y	XZHP-10	-8.2	7.9
GQ	Mozuizi	10	Machang Culture	2350-2000 BC	Y	WM3	-6.7	8.1
GQ	Mozuizi	10	Machang Culture	2350-2000 BC	Y	WM4	-7.4	8.8
GQ	Mozuizi	10	Machang Culture	2350-2000 BC	Y	WM5	-7.3	7.7
GQ	Mozuizi	10	Machang Culture	2350-2000 BC	Y	WM7	-6.9	8
GQ	Mozuizi	10	Machang Culture	2350-2000 BC	Y	WM8	-6.9	9.2
GQ	Mozuizi	10	Machang Culture	2350-2000 BC	Y	WM9	-7.1	8.3
GQ	Mozuizi	10	Machang Culture	2350-2000 BC	Y	WM11	-6.7	7.6
GQ	Mozuizi	10	Machang Culture	2350-2000 BC	Y	WM101	-7.8	8.5
GQ	Mozuizi	10	Machang Culture	2350-2000 BC	Y	WM105	-6.9	8.2
GQ	Mozuizi	10	Machang Culture	2350-2000 BC	Y	WM106	-7.3	8.8
GQ	Mozuizi	10	Machang Culture	2350-2000 BC	Y	WM107	-7.1	8.2
GQ	Mozuizi	10	Machang Culture	2350-2000 BC	Y	WM108	-6.7	8.4
GQ	Mozuizi	10	Machang Culture	2350-2000 BC	Y	WM109	-7.6	8.3
GQ	Mozuizi	10	Machang Culture	2350-2000 BC	Y	WM110	-7.8	8.3
GQ	Mozuizi	10	Machang Culture	2350-2000 BC	Y	05WM I M63	-8.1	7.7
GQ	Mozuizi	10	Machang Culture	2350-2000 BC	Y	05WM I T25 M70	-8.3	8
GQ	Wenbuju	10	Banshan-Machang	2000 BC	N	WJP02	-7.8	6.3
GQ	Wuba	10	Banshan-Machang	2450-1950 BC	Y	MW1	-6	10.2
GQ	Wuba	10	Banshan-Machang	2450-1950 BC	Y	MW2	-7.1	8.4
GQ	Wuba	10	Banshan-Machang	2450-1950 BC	Y	MW3	-7.6	7.8
GQ	Wuba	10	Banshan-Machang	2450-1950 BC	Y	MW4	-7.6	9.4
GQ	Wuba	10	Banshan-Machang	2450-1950 BC	Y	MW6	-6.8	12.5
GQ	Wuba	10	Banshan-Machang	2450-1950 BC	Y	MW7	-8.1	8.8
GQ	Wuba	10	Banshan-Machang	2450-1950 BC	Y	MW8	-7.7	7.7
GQ	Wuba	10	Banshan-Machang	2450-1950 BC	Y	MW9	-8	8.5
GQ	Wuba	10	Banshan-Machang	2450-1950 BC	Y	MW10	-7.3	9.2
GQ	Wuba	10	Banshan-Machang	2450-1950 BC	Y	MW11	-7	9.1
GQ	Wuba	10	Banshan-Machang	2450-1950 BC	Y	MW12	-7	7.7
GQ	Wuba	10	Banshan-Machang	2450-1950 BC	Y	MW13	-7.4	8.6
GQ	Wuba	10	Banshan-Machang	2450-1950 BC	Y	MW14	-7.5	8.5
GQ	Wuba	10	Banshan-Machang	2450-1950 BC	Y	MW15	-7.3	8.9
GQ	Wuba	10	Banshan-Machang	2450-1950 BC	Y	MW16	-7.3	9.1
GQ	Wuba	10	Banshan-Machang	2450-1950 BC	Y	MW17	-7.8	9.2
GQ	Wuba	10	Banshan-Machang	2450-1950 BC	Y	MW18	-8	9.2
GQ	Wuba	10	Banshan-Machang	2450-1950 BC	Y	MW19	-7.5	9.7
GQ	Wuba	10	Banshan-Machang	2450-1950 BC	Y	MW20	-8.4	8.5
GQ	Wuba	10	Banshan-Machang	2450-1950 BC	Y	MW21	-7.5	10.1
GQ	Wuba	10	Banshan-Machang	2450-1950 BC	Y	MW22	-7.2	9.2
GQ	Wuba	10	Banshan-Machang	2450-1950 BC	Y	MW23	-7.2	8.9
GQ	Wuba	10	Banshan-Machang	2450-1950 BC	Y	MW24	-6.6	11.3
GQ	Wuba	10	Banshan-Machang	2450-1950 BC	Y	MW25	-7.2	7.7
GQ	Wuba	10	Banshan-Machang	2450-1950 BC	Y	MW26	-7.1	9.8
GQ	Wuba	10	Banshan-Machang	2450-1950 BC	Y	MW27	-7.1	8.1
GQ	Wuba	10	Banshan-Machang	2450-1950 BC	Y	MW28	-7	8.9
GQ	Wuba	10	Banshan-Machang	2450-1950 BC	Y	MW29	-7.1	9.1
GQ	Wuba	10	Banshan-Machang	2450-1950 BC	Y	MW30	-6.7	10.8
GQ	Wuba	10	Banshan-Machang	2450-1950 BC	Y	MW31	-7.6	8.4
GQ	Wuba	10	Banshan-Machang	2450-1950 BC	Y	MW33	-7.1	7.9
GQ	Wuba	10	Banshan-Machang	2450-1950 BC	Y	MW34	-7.5	8.7
GQ	Wuba	10	Banshan-Machang	2450-1950 BC	Y	MW35	-8.2	9.3
GQ	Wuba	10	Banshan-Machang	2450-1950 BC	Y	MW36	-7.5	10.4
GQ	Wuba	10	Banshan-Machang	2450-1950 BC	Y	MW37	-7.3	9.8
GQ	Wuba	10	Banshan-Machang	2450-1950 BC	Y	MW38	-7.1	7.8
GQ	Wuba	10	Banshan-Machang	2450-1950 BC	Y	MW39	-7.1	8.4
GQ	Wuba	10	Banshan-Machang	2450-1950 BC	Y	MW40	-7.2	8
GQ	Wuba	10	Banshan-Machang	2450-1950 BC	Y	MW41	-5.6	12.1
GQ	Wuba	10	Banshan-Machang	2450-1950 BC	Y	MW43	-6.9	9
GQ	Wuba	10	Banshan-Machang	2450-1950 BC	Y	MW44	-6.6	11.4
GQ	Wuba	10	Banshan-Machang	2450-1950 BC	Y	MW45	-8.3	9.2
GQ	Wuba	10	Banshan-Machang	2450-1950 BC	Y	MW46	-7	9.2
GQ	Wuba	10	Banshan-Machang	2450-1950 BC	Y	MW47	-7.3	8.5
GQ	Wuba	10	Banshan-Machang	2450-1950 BC	Y	MW48	-6.7	11.4
GQ	Wuba	10	Banshan-Machang	2450-1950 BC	Y	MW49	-7.3	8.3
GQ	Wuba	10	Banshan-Machang	2450-1950 BC	Y	MW50	-7.8	8.8
GQ	Wuba	10	Banshan-Machang	2450-1950 BC	Y	MW51	-7.3	9.4
GQ	Wuba	10	Banshan-Machang	2450-1950 BC	Y	MW52	-7.4	8.3
GQ	Wuba	10	Banshan-Machang	2450-1950 BC	Y	MW53	-7.8	7.8
GQ	Buziping	10.5	Majiayao and Qijia	2126-1744 BC	Y	127	-7.3	8.1
GQ	Buzishan	10.5	Qijia	2126-1744 BC	Y	156	-7.3	8.3
GQ	Zongri	10	Zongri Culture	5200-4100 BP	Y	M273	-11.24	8.7
GQ	Zongri	10	Zongri Culture	5200-4100 BP	Y	M294	-10.35	9.19
GQ	Zongri	10	Zongri Culture	5200-4100 BP	Y	M297	-10.76	9.18
GQ	Zongri	10	Zongri Culture	5200-4100 BP	Y	M299	-9.4	8.1
GQ	Zongri	10	Zongri Culture	5200-4100 BP	Y	M324	-8.49	8.43
GQ	Zongri	10	Zongri Culture	5200-4100 BP	Y	M23	-9.91	9.23
GQ	Zongri	10	Zongri Culture	5200-4100 BP	Y	M27	-9.67	8.53
GQ	Zongri	10	Zongri Culture	5200-4100 BP	Y	M33	-8.92	7.86
GQ	Zongri	10	Zongri Culture	5200-4100 BP	Y	M78	-9.05	7.93
GQ	Zongri	10	Zongri Culture	5200-4100 BP	Y	M282	-10.88	8.81
GQ	Zongri	10	Zongri Culture	5200-4100 BP	Y	M1	-10.69	8.47
GQ	Zongri	10	Zongri Culture	5200-4100 BP	Y	M14	-8.92	7.82
GQ	Zongri	10	Zongri Culture	5200-4100 BP	Y	M22	-9.67	8.23
GQ	Zongri	10	Zongri Culture	5200-4100 BP	Y	M40	-9.64	8.29
GQ	Zongri	10	Zongri Culture	5200-4100 BP	Y	M75	-9.76	8.58
GQ	Zongri	10	Zongri Culture	5200-4100 BP	Y	M224	-9.15	7.59
GQ	Zongri	10	Zongri Culture	5200-4100 BP	Y	M227	-8.81	7.75
GQ	Zongri	10	Zongri Culture	5200-4100 BP	Y	M228	-9.32	8.03
GQ	Zongri	10	Zongri Culture	5200-4100 BP	Y	M32	-11.79	8.31
GQ	Zongri	10	Zongri Culture	5200-4100 BP	Y	M32:D	-12.2	8.37
GQ	Zongri	10	Zongri Culture	5200-4100 BP	Y	M41:A	-10.98	7.9
GQ	Zongri	10	Zongri Culture	5200-4100 BP	Y	M80	-11.82	8.13
GQ	Zongri	10	Zongri Culture	5200-4100 BP	Y	M251	-11.29	8.21
GQ	Zongri	10	Zongri Culture	5200-4100 BP	Y	M272	-9.46	8.38
GQ	Huoshiliang	11	Siba Culture	2135-1692 BC	Y	OZL292	-8.71	6.1
GQ	Huoshiliang	11	Siba Culture	2135-1692 BC	Y	OZL292	-8.86	9.76
GQ	Sanheyi	11	Qijia Culture	3912 ± 48 BP	Y	SHY01	-9	8.2
GQ	Sanheyi	11	Qijia Culture	3912 ± 48 BP	Y	SHY03	-9.7	9.6
GQ	Sanheyi	11	Qijia Culture	3912 ± 48 BP	Y	SHY05	-9.6	8.6
GQ	Sanheyi	11	Qijia Culture	3912 ± 48 BP	Y	SHY10	-8.4	5.5
GQ	Sanheyi	11	Qijia Culture	3912 ± 48 BP	Y	SHY11	-9	8.6
GQ	Xiahaishi	11	Machang Culture	1920-1800 BC	N	05LHX_M9	-7.22	9.62
GQ	Xiahaishi	11	Machang Culture	1920-1800 BC	N	05LHX_M17	-7.51	8.83
GQ	Xiahaishi	11	Machang Culture	1920-1800 BC	N	05LHX_M20	-7.26	9.17
GQ	Xiahaishi	11	Machang Culture	1920-1800 BC	N	05LHX_M25	-7.48	10.14
GQ	Xiahaishi	11	Machang Culture	1920-1800 BC	N	100	-7.3	8.9
GQ	Xiahaishi	11	Machang Culture	1920-1800 BC	N	101	-8.2	7.9
GQ	Xiahaishi	11	Machang Culture	1920-1800 BC	N	102	-7.4	8.1
GQ	Xiahaishi	11	Machang Culture	1920-1800 BC	N	103	-7.3	8.4
GQ	Xiahaishi	11	Machang Culture	1920-1800 BC	N	104	-7.5	8.9
GQ	Xiahaishi	11	Machang Culture	1920-1800 BC	N	105	-7.3	9.3
GQ	Xiahaishi	11	Machang Culture	1920-1800 BC	N	106	-7.5	8
GQ	Xiahaishi	11	Machang Culture	1920-1800 BC	N	107	-7.8	7.9
GQ	Xiahaishi	11	Machang Culture	1920-1800 BC	N	108	-8.3	6.1
GQ	Xichengyi	11	Siba-Machang Culture	4100-4600 BP	N	10ZHIVT0301M1	-9.76	9.59
GQ	Xichengyi	11	Siba-Machang Culture	4100-4600 BP	N	10ZHIVT0301M2	-9.07	10.3
GQ	Xichengyi	11	Siba-Machang Culture	4100-4600 BP	N	10ZHIVT0301M3	-8.66	12.54
GQ	Xichengyi	11	Siba-Machang Culture	4100-4600 BP	N	10ZHIVT0301M4	-8.27	14.17
GQ	Huoshaogou	11.5	Siba Culture	1900-1300 BC	Y	YH1	-12.5	12
GQ	Huoshaogou	11.5	Siba Culture	1900-1300 BC	Y	YH2	-12.7	13.8
GQ	Huoshaogou	11.5	Siba Culture	1900-1300 BC	Y	YH3	-11.5	11.6
GQ	Huoshaogou	11.5	Siba Culture	1900-1300 BC	Y	YH4	-14	12.4
GQ	Huoshaogou	11.5	Siba Culture	1900-1300 BC	Y	YH5	-13.8	12.8
GQ	Huoshaogou	11.5	Siba Culture	1900-1300 BC	Y	YH6	-14.1	12.4
GQ	Huoshaogou	11.5	Siba Culture	1900-1300 BC	Y	YH7	-14.1	12.5
GQ	Huoshaogou	11.5	Siba Culture	1900-1300 BC	Y	YH8	-12.6	13.2
GQ	Huoshaogou	11.5	Siba Culture	1900-1300 BC	Y	YH9	-12.9	12.7
GQ	Huoshaogou	11.5	Siba Culture	1900-1300 BC	Y	YH10	-6.9	8.8
GQ	Huoshaogou	11.5	Siba Culture	1900-1300 BC	Y	YH11	-12.4	11.1
GQ	Huoshaogou	11.5	Siba Culture	1900-1300 BC	Y	YH12	-12.7	13.9
GQ	Huoshaogou	11.5	Siba Culture	1900-1300 BC	Y	YH13	-11.2	11.4
GQ	Huoshaogou	11.5	Siba Culture	1900-1300 BC	Y	YH14	-10.9	13
GQ	Huoshaogou	11.5	Siba Culture	1900-1300 BC	Y	YH15	-10.9	11.6
GQ	Huoshaogou	11.5	Siba Culture	1900-1300 BC	Y	YH16	-13.1	12.4
GQ	Huoshaogou	11.5	Siba Culture	1900-1300 BC	Y	YH17	-12	12
GQ	Huoshaogou	11.5	Siba Culture	1900-1300 BC	Y	YH18	-13.6	12
GQ	Huoshaogou	11.5	Siba Culture	1900-1300 BC	Y	YH19	-13.3	12.4
GQ	Huoshaogou	11.5	Siba Culture	1900-1300 BC	Y	YH20	-13.8	12.4
GQ	Huoshaogou	11.5	Siba Culture	1900-1300 BC	Y	YH21	-10.8	12.9
GQ	Huoshaogou	11.5	Siba Culture	1900-1300 BC	Y	YH22	-9.2	9.1
GQ	Huoshaogou	11.5	Siba Culture	1900-1300 BC	Y	YH23	-7.4	8.8
GQ	Huoshaogou	11.5	Siba Culture	1900-1300 BC	Y	YH24	-13.9	12.5
GQ	Huoshaogou	11.5	Siba Culture	1900-1300 BC	Y	YH27	-11	12
GQ	Huoshaogou	11.5	Siba Culture	1900-1300 BC	Y	YH28	-12.9	13.7
GQ	Huoshaogou	11.5	Siba Culture	1900-1300 BC	Y	YH29	-10.4	9.9
GQ	Huoshaogou	11.5	Siba Culture	1900-1300 BC	Y	YH30	-11.2	11.9
GQ	Huoshaogou	11.5	Siba Culture	1900-1300 BC	Y	YH31	-10.4	11.4
GQ	Huoshaogou	11.5	Siba Culture	1900-1300 BC	Y	YH32	-14.1	12.8
GQ	Mogou	11.5	Qijia-Siwa Culture	1750-1100 BC	Y	MGM13-1	-11.1	9
GQ	Mogou	11.5	Qijia-Siwa Culture	1750-1100 BC	Y	MGM13-2	-13.6	8.3
GQ	Mogou	11.5	Qijia-Siwa Culture	1750-1100 BC	Y	MGM14-1	-14.9	7.7
GQ	Mogou	11.5	Qijia-Siwa Culture	1750-1100 BC	Y	MGM14-2	-14.4	8.3
GQ	Mogou	11.5	Qijia-Siwa Culture	1750-1100 BC	Y	MGM21-1	-15.2	7.8
GQ	Mogou	11.5	Qijia-Siwa Culture	1750-1100 BC	Y	MGM21-2	-11.6	8.1
GQ	Mogou	11.5	Qijia-Siwa Culture	1750-1100 BC	Y	MGM60-1	-14.8	8.2
GQ	Mogou	11.5	Qijia-Siwa Culture	1750-1100 BC	Y	MGM60-2	-11.4	8.2
GQ	Mogou	11.5	Qijia-Siwa Culture	1750-1100 BC	Y	MGM60-3	-14	8.5
GQ	Mogou	11.5	Qijia-Siwa Culture	1750-1100 BC	Y	MGM60-4	-13.1	8.1
GQ	Mogou	11.5	Qijia-Siwa Culture	1750-1100 BC	Y	MGM106-1	-14.4	7.8
GQ	Mogou	11.5	Qijia-Siwa Culture	1750-1100 BC	Y	MGM106-2	-13.4	7.7
GQ	Mogou	11.5	Qijia-Siwa Culture	1750-1100 BC	Y	MGM106-3	-12.2	7.2
GQ	Mogou	11.5	Qijia-Siwa Culture	1750-1100 BC	Y	MGM217-1	-14.2	9.3
GQ	Mogou	11.5	Qijia-Siwa Culture	1750-1100 BC	Y	MGM217-2	-14.4	8.7
GQ	Mogou	11.5	Qijia-Siwa Culture	1750-1100 BC	Y	MGM373-1	-12.5	8.9
GQ	Mogou	11.5	Qijia-Siwa Culture	1750-1100 BC	Y	MGM373-2	-12.8	7.9
GQ	Mogou	11.5	Qijia-Siwa Culture	1750-1100 BC	Y	MGM373-3	-14.2	8.1
GQ	Mogou	11.5	Qijia-Siwa Culture	1750-1100 BC	Y	MGM375-1	-11.2	8.7
GQ	Mogou	11.5	Qijia-Siwa Culture	1750-1100 BC	Y	MGM375-2	-13.3	9.6
GQ	Mogou	11.5	Qijia-Siwa Culture	1750-1100 BC	Y	MGM375-3	-13.4	9
GQ	Mogou	11.5	Qijia-Siwa Culture	1750-1100 BC	Y	MGM375-4	-14.7	8.8
GQ	Mogou	11.5	Qijia-Siwa Culture	1750-1100 BC	Y	MGM383-1	-13.6	8.1
GQ	Mogou	11.5	Qijia-Siwa Culture	1750-1100 BC	Y	MGM383-2	-14	8.2
GQ	Mogou	11.5	Qijia-Siwa Culture	1750-1100 BC	Y	MGM383-3	-15	9.2
GQ	Mogou	11.5	Qijia-Siwa Culture	1750-1100 BC	Y	MGM384-1	-16.5	8.6
GQ	Mogou	11.5	Qijia-Siwa Culture	1750-1100 BC	Y	MGM384-2	-17.2	8.3
GQ	Mogou	11.5	Qijia-Siwa Culture	1750-1100 BC	Y	MGM384-3	-16.5	9
GQ	Mogou	11.5	Qijia-Siwa Culture	1750-1100 BC	Y	MGM389-2	-15.1	8.2
GQ	Mogou	11.5	Qijia-Siwa Culture	1750-1100 BC	Y	MGM393-1	-15.4	9.7
GQ	Mogou	11.5	Qijia-Siwa Culture	1750-1100 BC	Y	MGM393-2	-16.7	7.7
GQ	Mogou	11.5	Qijia-Siwa Culture	1750-1100 BC	Y	MGM393-3	-15.8	7.7
GQ	Mogou	11.5	Qijia-Siwa Culture	1750-1100 BC	Y	MGM393-4	-16.5	8
GQ	Mogou	11.5	Qijia-Siwa Culture	1750-1100 BC	Y	MGM393-5	-15.4	8.5
GQ	Mogou	11.5	Qijia-Siwa Culture	1750-1100 BC	Y	MGM416-1	-17.2	8.9
GQ	Mogou	11.5	Qijia-Siwa Culture	1750-1100 BC	Y	MGM416-2	-15	8.5
GQ	Mogou	11.5	Qijia-Siwa Culture	1750-1100 BC	Y	MGM416-3	-15.8	8.1
GQ	Mogou	11.5	Qijia-Siwa Culture	1750-1100 BC	Y	MGM416-4	-16.8	8.5
GQ	Mogou	11.5	Qijia-Siwa Culture	1750-1100 BC	Y	MGM416-5	-14.7	9
GQ	Mogou	11.5	Qijia-Siwa Culture	1750-1100 BC	Y	MGM440-1	-14.4	8.5
GQ	Mogou	11.5	Qijia-Siwa Culture	1750-1100 BC	Y	MGM440-2	-16.6	8.4
GQ	Mogou	11.5	Qijia-Siwa Culture	1750-1100 BC	Y	MGM440-3	-12.4	9.3
GQ	Mogou	11.5	Qijia-Siwa Culture	1750-1100 BC	Y	MGM440-4	-16.8	9.3
GQ	Mogou	11.5	Qijia-Siwa Culture	1750-1100 BC	Y	M861R1	-15.7	9
GQ	Mogou	11.5	Qijia-Siwa Culture	1750-1100 BC	Y	M861R2	-16.8	9.4
GQ	Mogou	11.5	Qijia-Siwa Culture	1750-1100 BC	Y	M861R3	-16.7	9.8
GQ	Mogou	11.5	Qijia-Siwa Culture	1750-1100 BC	Y	M861R4	-16.8	8.7
GQ	Mogou	11.5	Qijia-Siwa Culture	1750-1100 BC	Y	M861R5	-18.5	10.6
GQ	Mogou	11.5	Qijia-Siwa Culture	1750-1100 BC	Y	CM2	-16	8.9
GQ	Mogou	11.5	Qijia-Siwa Culture	1750-1100 BC	Y	CM3	-12.5	12.7
GQ	Mogou	11.5	Qijia-Siwa Culture	1750-1100 BC	Y	CM4	-12.6	12.7
GQ	Mogou	11.5	Qijia-Siwa Culture	1750-1100 BC	Y	CM5	-12.4	9.2
GQ	Mogou	11.5	Qijia-Siwa Culture	1750-1100 BC	Y	CM6	-13.7	9.9
GQ	Mogou	11.5	Qijia-Siwa Culture	1750-1100 BC	Y	CM7	-12.9	10.2
GQ	Mogou	11.5	Qijia-Siwa Culture	1750-1100 BC	Y	CM8	-14.8	9.4
GQ	Mogou	11.5	Qijia-Siwa Culture	1750-1100 BC	Y	CM9	-13.3	10.4
GQ	Mogou	11.5	Qijia-Siwa Culture	1750-1100 BC	Y	CM10	-11.2	9.4
GQ	Mogou	11.5	Qijia-Siwa Culture	1750-1100 BC	Y	CM11	-15.8	10.1
GQ	Mogou	11.5	Qijia-Siwa Culture	1750-1100 BC	Y	CM12	-11.9	11.5
GQ	Mogou	11.5	Qijia-Siwa Culture	1750-1100 BC	Y	CM13	-12.7	10.6
GQ	Mogou	11.5	Qijia-Siwa Culture	1750-1100 BC	Y	CM14	-15.1	9.7
GQ	Mogou	11.5	Qijia-Siwa Culture	1750-1100 BC	Y	CM15	-13.9	9.5
GQ	Mogou	11.5	Qijia-Siwa Culture	1750-1100 BC	Y	CM16	-14.3	9.8
GQ	Mogou	11.5	Qijia-Siwa Culture	1750-1100 BC	Y	CM17	-14.5	10.1
GQ	Mogou	11.5	Qijia-Siwa Culture	1750-1100 BC	Y	CM18	-15.5	9.2
GQ	Mogou	11.5	Qijia-Siwa Culture	1750-1100 BC	Y	CM19	-13.4	10
GQ	Mogou	11.5	Qijia-Siwa Culture	1750-1100 BC	Y	CM20	-15.7	9.7
GQ	Mogou	11.5	Qijia-Siwa Culture	1750-1100 BC	Y	CM21	-16.4	9.1
GQ	Mogou	11.5	Qijia-Siwa Culture	1750-1100 BC	Y	CM22	-14.3	10.3
GQ	Mogou	11.5	Qijia-Siwa Culture	1750-1100 BC	Y	CM23	-14.4	12.1
GQ	Mogou	11.5	Qijia-Siwa Culture	1750-1100 BC	Y	CM24	-13.1	9.2
GQ	Mogou	11.5	Qijia-Siwa Culture	1750-1100 BC	Y	CM25	-16.2	9.1
GQ	Mogou	11.5	Qijia-Siwa Culture	1750-1100 BC	Y	CM26	-12.9	9.3
GQ	Mogou	11.5	Qijia-Siwa Culture	1750-1100 BC	Y	CM27	-12.4	12.3
GQ	Mogou	11.5	Qijia-Siwa Culture	1750-1100 BC	Y	CM28	-12.4	12.7
GQ	Mogou	11.5	Qijia-Siwa Culture	1750-1100 BC	Y	CM29	-17.1	9.4
GQ	Mogou	11.5	Qijia-Siwa Culture	1750-1100 BC	Y	CM30	-14.4	9.2
GQ	Mogou	11.5	Qijia-Siwa Culture	1750-1100 BC	Y	CM31	-13.7	10.5
GQ	Mogou	11.5	Qijia-Siwa Culture	1750-1100 BC	Y	CM32	-11	9
GQ	Mogou	11.5	Qijia-Siwa Culture	1750-1100 BC	Y	CM33	-13.7	9.9
GQ	Mogou	11.5	Qijia-Siwa Culture	1750-1100 BC	Y	CM34	-14.4	12.2
GQ	Mogou	11.5	Qijia-Siwa Culture	1750-1100 BC	Y	CM35	-11.8	11.5
GQ	Mogou	11.5	Qijia-Siwa Culture	1750-1100 BC	Y	CM36	-14.2	9.7
GQ	Mogou	11.5	Qijia-Siwa Culture	1750-1100 BC	Y	CM37	-16.6	10
GQ	Ganguyai	12	Siba Culture	1350-950 BC	Y	JG1	-13.3	12.1
GQ	Ganguyai	12	Siba Culture	1350-950 BC	Y	JG2	-15.4	10.9
GQ	Ganguyai	12	Siba Culture	1350-950 BC	Y	JG3	-15	13.2
GQ	Ganguyai	12	Siba Culture	1350-950 BC	Y	JG4	-15.8	11.5
GQ	Ganguyai	12	Siba Culture	1350-950 BC	Y	JG5	-17.4	11.3
GQ	Ganguyai	12	Siba Culture	1350-950 BC	Y	JG6	-12.9	12.8
GQ	Ganguyai	12	Siba Culture	1350-950 BC	Y	JG7	-15.9	12.7
GQ	Ganguyai	12	Siba Culture	1350-950 BC	Y	JG8	-15.4	9.6
GQ	Ganguyai	12	Siba Culture	1350-950 BC	Y	JG9	-15.2	12.9
GQ	Ganguyai	12	Siba Culture	1350-950 BC	Y	JG10	-14.1	11
GQ	Ganguyai	12	Siba Culture	1350-950 BC	Y	JG11	-15.2	12.3
GQ	Ganguyai	12	Siba Culture	1350-950 BC	Y	JG12	-14.6	11.8
GQ	Ganguyai	12	Siba Culture	1350-950 BC	Y	JG13	-16.1	11.7
GQ	Ganguyai	12	Siba Culture	1350-950 BC	Y	JG14	-14.2	11.9
GQ	Ganguyai	12	Siba Culture	1350-950 BC	Y	JG15	-15.9	11.6
GQ	Ganguyai	12	Siba Culture	1350-950 BC	Y	JG16	-16.4	11.6
GQ	Ganguyai	12	Siba Culture	1350-950 BC	Y	JG17	-13.6	11.9
GQ	Ganguyai	12	Siba Culture	1350-950 BC	Y	JG18	-14.1	12.6
GQ	Ganguyai	12	Siba Culture	1350-950 BC	Y	JG19	-18.6	11.6
GQ	Ganguyai	12	Siba Culture	1350-950 BC	Y	JG20	-18	11.6
GQ	Ganguyai	12	Siba Culture	1350-950 BC	Y	JG21	-17.2	11.4
GQ	Ganguyai	12	Siba Culture	1350-950 BC	Y	JG22	-14.6	11.9
GQ	Ganguyai	12	Siba Culture	1350-950 BC	Y	JG23	-18.7	10.9
GQ	Ganguyai	12	Siba Culture	1350-950 BC	Y	JG24	-15.3	9.6
GQ	Ganguyai	12	Siba Culture	1350-950 BC	Y	JG25	-14.5	11.2
GQ	Ganguyai	12	Siba Culture	1350-950 BC	Y	JG26	-14.6	12.1
GQ	Ganguyai	12	Siba Culture	1350-950 BC	Y	JG27	-14.6	9.6
GQ	Ganguyai	12	Siba Culture	1350-950 BC	Y	JG28	-15.4	13.1
GQ	Ganguyai	12	Siba Culture	1350-950 BC	Y	JG29	-13.2	11.4
GQ	Ganguyai	12	Siba Culture	1350-950 BC	Y	JG30	-13.5	11.3
GQ	Lajigai	12	Kayue Culture	3205 ± 123 BP	Y	LJG01	-15.4	9.7
GQ	Lajigai	12	Kayue Culture	3205 ± 123 BP	Y	LJG02*	-13.1	8.6
GQ	Lajigai	12	Kayue Culture	3205 ± 123 BP	Y	LJG06	-13.2	8.5
GQ	Lajigai	12	Kayue Culture	3205 ± 123 BP	Y	LJG07	-17.4	8.8
GQ	Lajigai	12	Kayue Culture	3205 ± 123 BP	Y	LJG08	-15.4	9.4
GQ	Lianhuatai	12	Xindian Culture	1470-1080 BC	N	84LL_M4	-10.34	8.27
GQ	Lianhuatai	12	Xindian Culture	1470-1080 BC	N	84LL_M5	-10.24	8.22
GQ	Lianhuatai	12	Xindian Culture	1470-1080 BC	N	84LL_M2 or M6	-9.38	8.48
GQ	Lianhuatai	12	Xindian Culture	1470-1080 BC	N	84LL_M7	-10.13	8.68
GQ	Lianhuatai	12	Xindian Culture	1470-1080 BC	N	84LL_M8	-9.71	8.95
GQ	Lianhuatai	12	Xindian Culture	1470-1080 BC	N	84LL_M10-1(?)	-10.03	8.6
GQ	Qijiaping	12	Qijia Culture	1515-1264 BC	N	M10-1	-9.6	9.8
GQ	Qijiaping	12	Qijia Culture	1515-1264 BC	N	M10-2	-9.1	9.8
GQ	Qijiaping	12	Qijia Culture	1515-1264 BC	N	M22-1	-7.5	9
GQ	Qijiaping	12	Qijia Culture	1515-1264 BC	N	M22-4-1	-8.2	10
GQ	Qijiaping	12	Qijia Culture	1515-1264 BC	N	M22-4-4	-8.4	9.3
GQ	Qijiaping	12	Qijia Culture	1515-1264 BC	N	M25-1	-10.7	9.6
GQ	Qijiaping	12	Qijia Culture	1515-1264 BC	N	M89-1	-8.6	9.2
GQ	Qijiaping	12	Qijia Culture	1515-1264 BC	N	M89-2	-8.4	9.2
GQ	Qijiaping	12	Qijia Culture	1515-1264 BC	N	M95-1	-8.1	9.3
GQ	Qijiaping	12	Qijia Culture	1515-1264 BC	N	M95-2	-11	9.6
GQ	Qijiaping	12	Qijia Culture	1515-1264 BC	N	M98-1	-8.7	10
GQ	Qijiaping	12	Qijia Culture	1515-1264 BC	N	M99	-8.4	9
GQ	Qijiaping	12	Qijia Culture	1515-1264 BC	N	M100-1	-8.7	10.6
GQ	Qijiaping	12	Qijia Culture	1515-1264 BC	N	M100-2	-8.2	9.6
GQ	Qijiaping	12	Qijia Culture	1515-1264 BC	N	M103	-8.2	10.3
GQ	Qijiaping	12	Qijia Culture	1515-1264 BC	N	M104-2	-10.4	14.1
GQ	Qijiaping	12	Qijia Culture	1515-1264 BC	N	M105-1	-8.8	9.8
GQ	Qijiaping	12	Qijia Culture	1515-1264 BC	N	M108-1-1	-8.7	8.9
GQ	Qijiaping	12	Qijia Culture	1515-1264 BC	N	M108-2	-8.8	11.3
GQ	Qijiaping	12	Qijia Culture	1515-1264 BC	N	M108-4-1	-8	9.7
GQ	Qijiaping	12	Qijia Culture	1515-1264 BC	N	M108-4-2	-8	9.8
GQ	Qijiaping	12	Qijia Culture	1515-1264 BC	N	M109	-8.4	9.8
GQ	Qijiaping	12	Qijia Culture	1515-1264 BC	N	M110-1-1	-13.4	12.1
GQ	Qijiaping	12	Qijia Culture	1515-1264 BC	N	M110-1-2	-9.7	10
GQ	Qijiaping	12	Qijia Culture	1515-1264 BC	N	M110-4	-8.7	10.1
GQ	Qijiaping	12	Qijia Culture	1515-1264 BC	N	M110-2-2	-8.9	9.9
GQ	Qijiaping	12	Qijia Culture	1515-1264 BC	N	M110-3-1	-8.6	9.8
GQ	Qijiaping	12	Qijia Culture	1515-1264 BC	N	M110-3-2	-8.7	9.6
GQ	Qijiaping	12	Qijia Culture	1515-1264 BC	N	M110-5-1	-8.7	9
GQ	Qijiaping	12	Qijia Culture	1515-1264 BC	N	M110-5-2	-8.5	9.7
GQ	Qijiaping	12	Qijia Culture	1515-1264 BC	N	M110-6-1	-8.6	10
GQ	Qijiaping	12	Qijia Culture	1515-1264 BC	N	M110-6-2	-8.1	9.4
GQ	Qijiaping	12	Qijia Culture	1515-1264 BC	N	M110-7-3	-8.8	10.1
GQ	Qijiaping	12	Qijia Culture	1515-1264 BC	N	M111	-10.3	8.9
GQ	Qijiaping	12	Qijia Culture	1515-1264 BC	N	M13-3	-7.7	9.4
GQ	Qijiaping	12	Qijia Culture	1515-1264 BC	N	M22-4-2	-8.9	9.3
GQ	Qijiaping	12	Qijia Culture	1515-1264 BC	N	M90-1	-8.4	9.7
GQ	Qijiaping	12	Qijia Culture	1515-1264 BC	N	M96-1	-8.6	9.2
GQ	Qijiaping	12	Qijia Culture	1515-1264 BC	N	M105-2	-9.4	10.1
GQ	Qijiaping	12	Qijia Culture	1515-1264 BC	N	M110-1-3	-8	10
GQ	Qijiaping	12	Qijia Culture	1515-1264 BC	N	M104-1	-9.4	9
GQ	Qijiaping	12	Qijia Culture	1515-1264 BC	N	M98-2	-7.6	9.4
GQ	Zhanqi	12	Siwa Culture	1100-950 BC	Y	08MWZ_M1	-17.1	9.53
GQ	Zhanqi	12	Siwa Culture	1100-950 BC	Y	08MWZ_M49	-16.3	9.96
GQ	Zhanqi	12	Siwa Culture	1100-950 BC	Y	08MWZ_M53	-16.78	11
GQ	Zhanqi	12	Siwa Culture	1100-950 BC	Y	08MWZ_M65	-16.04	10.92
GQ	Zhanqi	12	Siwa Culture	1100-950 BC	Y	08MWZ_M24	-14.57	9.42
GQ	Zhanqi	12	Siwa Culture	1100-950 BC	Y	08MWZ_TG4M24	-15.46	9.51
GQ	Zhanqi	12	Siwa Culture	1100-950 BC	Y	08MWZ_M25	-14.85	11.44
GQ	Zhanqi	12	Siwa Culture	1100-950 BC	Y	08MWZ_TG4M25	-15.87	11.22
GQ	Zhanqi	12	Siwa Culture	1100-950 BC	Y	MZ1	-15.1	10.4
GQ	Zhanqi	12	Siwa Culture	1100-950 BC	Y	MZ2	-15.4	9.3
GQ	Zhanqi	12	Siwa Culture	1100-950 BC	Y	MZ3	-16.4	10.5
GQ	Zhanqi	12	Siwa Culture	1100-950 BC	Y	MZ4	-15.6	10.6
GQ	Zhanqi	12	Siwa Culture	1100-950 BC	Y	MZ5	-13.4	11.5
GQ	Zhanqi	12	Siwa Culture	1100-950 BC	Y	MZ6	-12.9	10.9
GQ	Zhanqi	12	Siwa Culture	1100-950 BC	Y	MZ7	-17	9.9
GQ	Zhanqi	12	Siwa Culture	1100-950 BC	Y	MZ8	-16.8	10.7
GQ	Zhanqi	12	Siwa Culture	1100-950 BC	Y	MZ9	-15.9	10.4
GQ	Zhanqi	12	Siwa Culture	1100-950 BC	Y	MZ10	-15.6	10.6
GQ	Zhanqi	12	Siwa Culture	1100-950 BC	Y	MZ11	-14.6	10.7
GQ	Zhanqi	12	Siwa Culture	1100-950 BC	Y	MZ12	-14.9	10
GQ	Zhanqi	12	Siwa Culture	1100-950 BC	Y	MZ14	-14.7	9.3
GQ	Zhanqi	12	Siwa Culture	1100-950 BC	Y	MZ15	-16.3	9.7
GQ	Zhanqi	12	Siwa Culture	1100-950 BC	Y	MZ16	-15.6	10.9
GQ	Zhanqi	12	Siwa Culture	1100-950 BC	Y	MZ17	-14.8	10.8
GQ	Zhanqi	12	Siwa Culture	1100-950 BC	Y	MZ18	-14.5	10.6
GQ	Zhanqi	12	Siwa Culture	1100-950 BC	Y	MZ19	-16.7	9.6
GQ	Zhanqi	12	Siwa Culture	1100-950 BC	Y	MZ20	-15.4	11
GQ	Zhanqi	12	Siwa Culture	1100-950 BC	Y	MZ21	-14.9	10.9
GQ	Zhanqi	12	Siwa Culture	1100-950 BC	Y	MZ22	-15.6	10.1
GQ	Zhanqi	12	Siwa Culture	1100-950 BC	Y	MZ23	-15.1	9.4
GQ	Zhanqi	12	Siwa Culture	1100-950 BC	Y	MZ24	-15.6	10.9
GQ	Zhanqi	12	Siwa Culture	1100-950 BC	Y	MZ25	-17.9	5.8
GQ	Zhanqi	12	Siwa Culture	1100-950 BC	Y	MZ26	-15	9.2
GQ	Zhanqi	12	Siwa Culture	1100-950 BC	Y	MZ27	-18.6	4.6
GQ	Zhanqi	12	Siwa Culture	1100-950 BC	Y	MZ28	-18	5.2
GQ	Zhanqi	12	Siwa Culture	1100-950 BC	Y	MZ29	-16.7	9
GQ	Zhanqi	12	Siwa Culture	1100-950 BC	Y	MZ30	-19.1	4.4
GQ	Zhanqi	12	Siwa Culture	1100-950 BC	Y	MZ31	-19.2	5.3
GQ	Zhanqi	12	Siwa Culture	1100-950 BC	Y	MZ32	-17.9	7.6
GQ	Zhanqi	12	Siwa Culture	1100-950 BC	Y	MZ33	-17.8	8.1
GQ	Zhanqi	12	Siwa Culture	1100-950 BC	Y	MZ34	-19	5.4
GQ	Zhanqi	12	Siwa Culture	1100-950 BC	Y	MZ35	-13.7	10.2
GQ	Zhanqi	12	Siwa Culture	1100-950 BC	Y	MZ36	-14.2	8.4
GQ	Xishan	12.5	Western Zhou	1100-771 BC	N	XSH-M2004	-12.58	9
GQ	Xishan	12.5	Western Zhou	1100-771 BC	N	XSH-M2003 N	-12.25	9.17
GQ	Xishan	12.5	Western Zhou	1100-771 BC	N	XSH-M2003 S	-12.19	9.7
GQ	Xishan	12.5	Western Zhou	1100-771 BC	N	XSH-M1014	-8.87	10.02
GQ	Xishan	12.5	Western Zhou	1100-771 BC	N	XHS-M1009	-11.74	9.67
GQ	Xishan	14	Warring States	475-221 BC	N	XSH-M1028	-12.56	8.36
GQ	Xishan	14	Warring States	475-221 BC	N	XSH-M1020	-13.33	8.37
GQ	Xishan	14	Warring States	475-221 BC	N	XSH-M1011	-13.72	8.79
GQ	Xishan	14	Warring States	475-221 BC	N	XSH-M1016	-13.97	9.76
GQ	Xishan	14	Warring States	475-221 BC	N	XSH-M1024	-11.46	8.88
GQ	Xishan	14	Warring States	475-221 BC	N	XSH-M1023	-7.56	9.13
GQ	Xishan	14	Warring States	475-221 BC	N	XSH-M1022	-13.22	8.7
GQ	Xishan	14	Warring States	475-221 BC	N	XSH-M1017	-11.82	9.37
GQ	Xishan	14	Warring States	475-221 BC	N	XSH-M1002	-7.67	10.75
GQ	Xishan	14	Warring States	475-221 BC	N	XHS-M1015	-14.09	7.67
GQ	Xishan	14	Warring States	475-221 BC	N	XSH-M1027-2	-11.49	8.45
GQ	Xishan	14	Warring States	475-221 BC	N	XSH-M1027-1	-8.86	9.59
GQ	Xishan	14	Warring States	475-221 BC	N	XSH-M1027 M	-9.11	10.03
GQ	Xishan	14	Warring States	475-221 BC	N	XSH-M4004	-10.56	9.92
